# Supplementary material for: Aromatic Polyketides from the Deep-Sea Cold-Seep Mussel Associated Endozoic Fungus Talaromyces minioluteus CS-138
Source: MDPI journal article supplement (doi:10.3390/md20080529), 2022-08-18

## Supplementary Material

# Aromatic Polyketides from the Deep-Sea Cold-Seep Mussel Associated Endozoic Fungus *Talaromyces minioluteus* CS-138

Qi Song <sup>1,2,3</sup><sup>†</sup>, Sui-Qun Yang <sup>1,2,4</sup><sup>†</sup>, Xiao-Ming Li <sup>1,2,4</sup>, Xue-Yi Hu <sup>1,2,3</sup>, Xin Li <sup>1,2,4</sup> and Bin-Gui Wang <sup>1,2,3,4,\*</sup>

<sup>1</sup> CAS and Shandong Province Key Laboratory of Experimental Marine Biology, Institute of Oceanology, Chinese Academy of Sciences, Nanhai Road 7, Qingdao 266071, China

<sup>2</sup> Laboratory of Marine Biology and Biotechnology, Qingdao National Laboratory for Marine Science and Technology, Wenhai Road 1, Qingdao 266237, China

<sup>3</sup> College of Marine Science, University of Chinese Academy of Sciences, Yuquan Road 19A, Beijing 100049, China

<sup>4</sup> Center for Ocean Mega-Science, Chinese Academy of Sciences, Nanhai Road 7, Qingdao 266071, China

\* Correspondence: wangbg@ms.qdio.ac.cn (B.-G.W.); Tel.: +86-532-8289-8553 (B.-G.W.)

<sup>†</sup>These authors contributed equally to this work.

## Contents

- Figure S1. HRESIMS spectrum of compound **1**;
- Figure S2.  $^1\text{H}$  NMR (500 MHz,  $\text{DMSO-}d_6$ ) spectrum of compound **1**;
- Figure S3.  $^{13}\text{C}$  NMR (125 MHz,  $\text{DMSO-}d_6$ ) and DEPT spectra of compound **1**;
- Figure S4. COSY spectrum of compound **1**;
- Figure S5. HSQC spectrum of compound **1**;
- Figure S6. HMBC spectrum of compound **1**;
- Figure S7. HRESIMS spectrum of compound **2**;
- Figure S8.  $^1\text{H}$  NMR (500 MHz,  $\text{DMSO-}d_6$ ) spectrum of compound **2**;
- Figure S9.  $^{13}\text{C}$  NMR (125 MHz,  $\text{DMSO-}d_6$ ) and DEPT spectra of compound **2**;
- Figure S10. HSQC spectrum of compound **2**;
- Figure S11. HMBC spectrum of compound **2**;
- Figure S12. Crystal packing of compound **2** at 293(2) K;
- Figure S13. HRESIMS spectrum of compound **3**;
- Figure S14.  $^1\text{H}$  NMR (500 MHz,  $\text{DMSO-}d_6$ ) spectrum of compound **3**;
- Figure S15.  $^{13}\text{C}$  NMR (125 MHz,  $\text{DMSO-}d_6$ ) and DEPT spectra of compound **3**;
- Figure S16. HSQC spectrum of compound **3**;
- Figure S17. HMBC spectrum of compound **3**;
- Figure S18. HRESIMS spectrum of compound **4**;
- Figure S19.  $^1\text{H}$  NMR (500 MHz,  $\text{DMSO-}d_6$ ) spectrum of compound **4**;
- Figure S20.  $^{13}\text{C}$  NMR (125 MHz,  $\text{DMSO-}d_6$ ) and DEPT spectra of compound **4**;
- Figure S21. HSQC spectrum of compound **4**;
- Figure S22. HMBC spectrum of compound **4**;
- Figure S23. Crystal packing of compound **4** at 296(2) K;
- Figure S24. HRESIMS spectrum of compound **5**;
- Figure S25.  $^1\text{H}$  NMR (500 MHz,  $\text{DMSO-}d_6$ ) spectrum of compound **5**;
- Figure S26.  $^{13}\text{C}$  NMR (125 MHz,  $\text{DMSO-}d_6$ ) and DEPT spectra of compound **5**;
- Figure S27. HSQC spectrum of compound **5**;
- Figure S28. HMBC spectrum of compound **5**;
- Figure S29. Crystal packing of compound **5** at 298(2) K;
- Figure S30. HRESIMS spectrum of compound **6**;
- Figure S31.  $^1\text{H}$  NMR (500 MHz,  $\text{DMSO-}d_6$ ) spectrum of compound **6**;
- Figure S32.  $^{13}\text{C}$  NMR (125 MHz,  $\text{DMSO-}d_6$ ) and DEPT spectra of compound **6**.

**Figure S1.** HRESIMS spectrum of compound **1**.

20210412-CS138-71\_210412110711 #56-60 RT: 0.88-0.94 AV: 5 NL: 2.64E6  
T: FTMS - p ESI: sid=40.00 Full ms [150.00-1000.00]

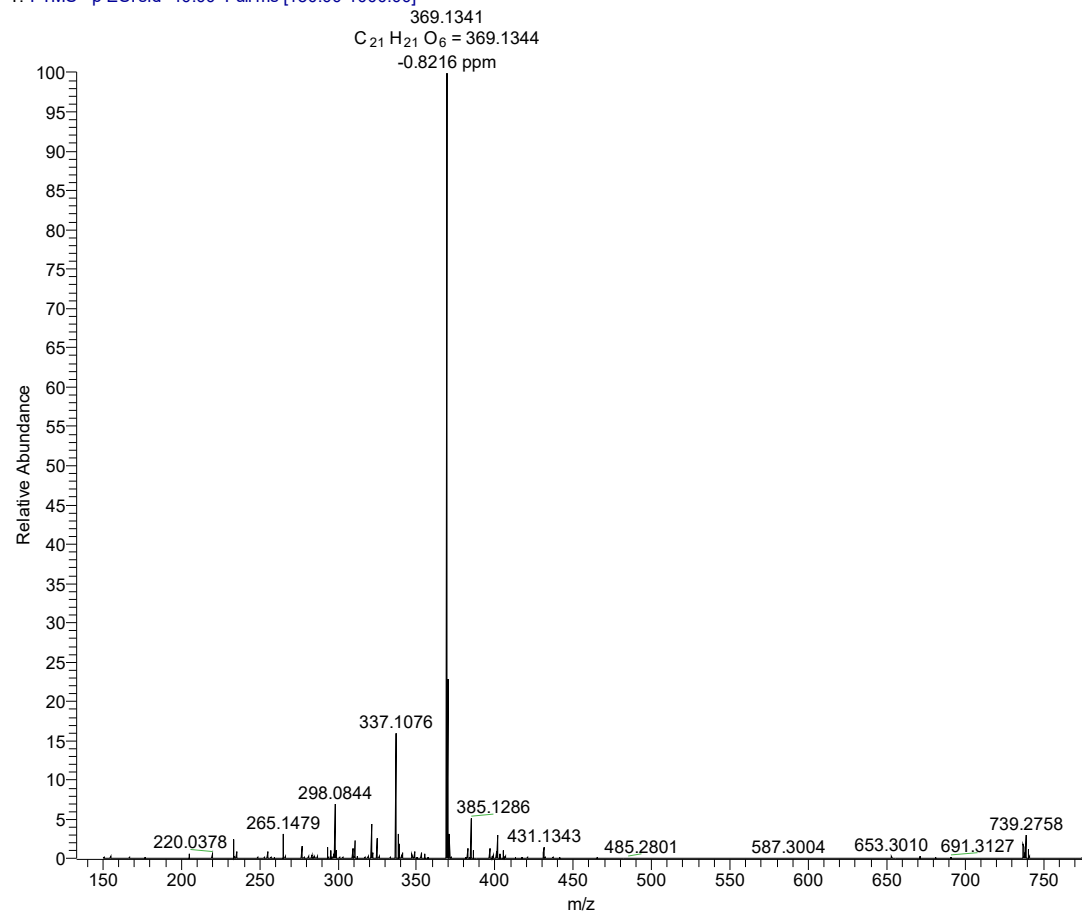

**Figure S2.**  $^1\text{H}$  NMR (500 MHz,  $\text{DMSO}-d_6$ ) spectrum of compound **1**.

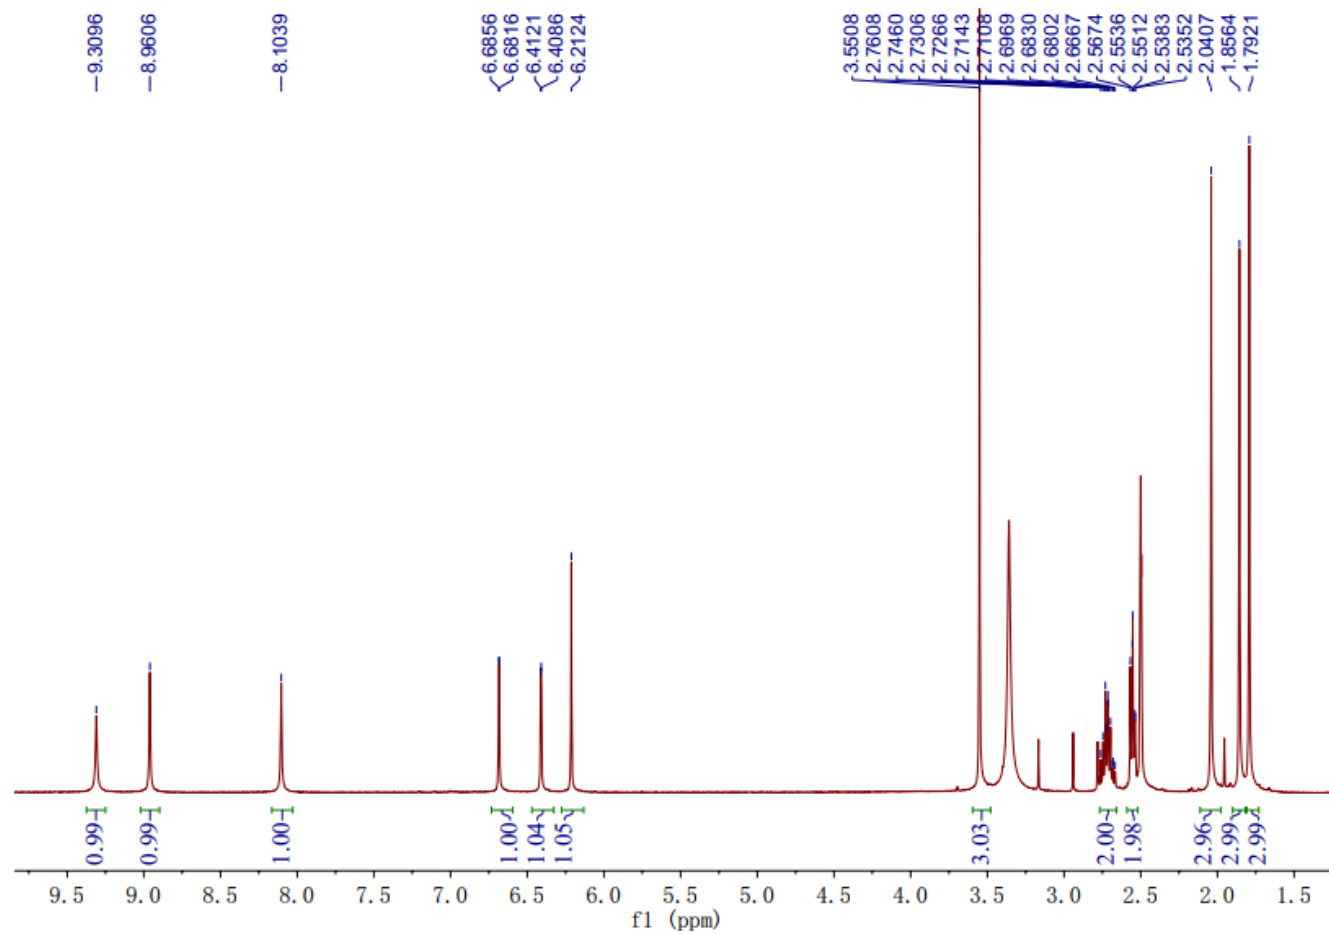

**Figure S3.**  $^{13}\text{C}$  NMR (125 MHz,  $\text{DMSO-}d_6$ ) and DEPT spectra of compound **1**.

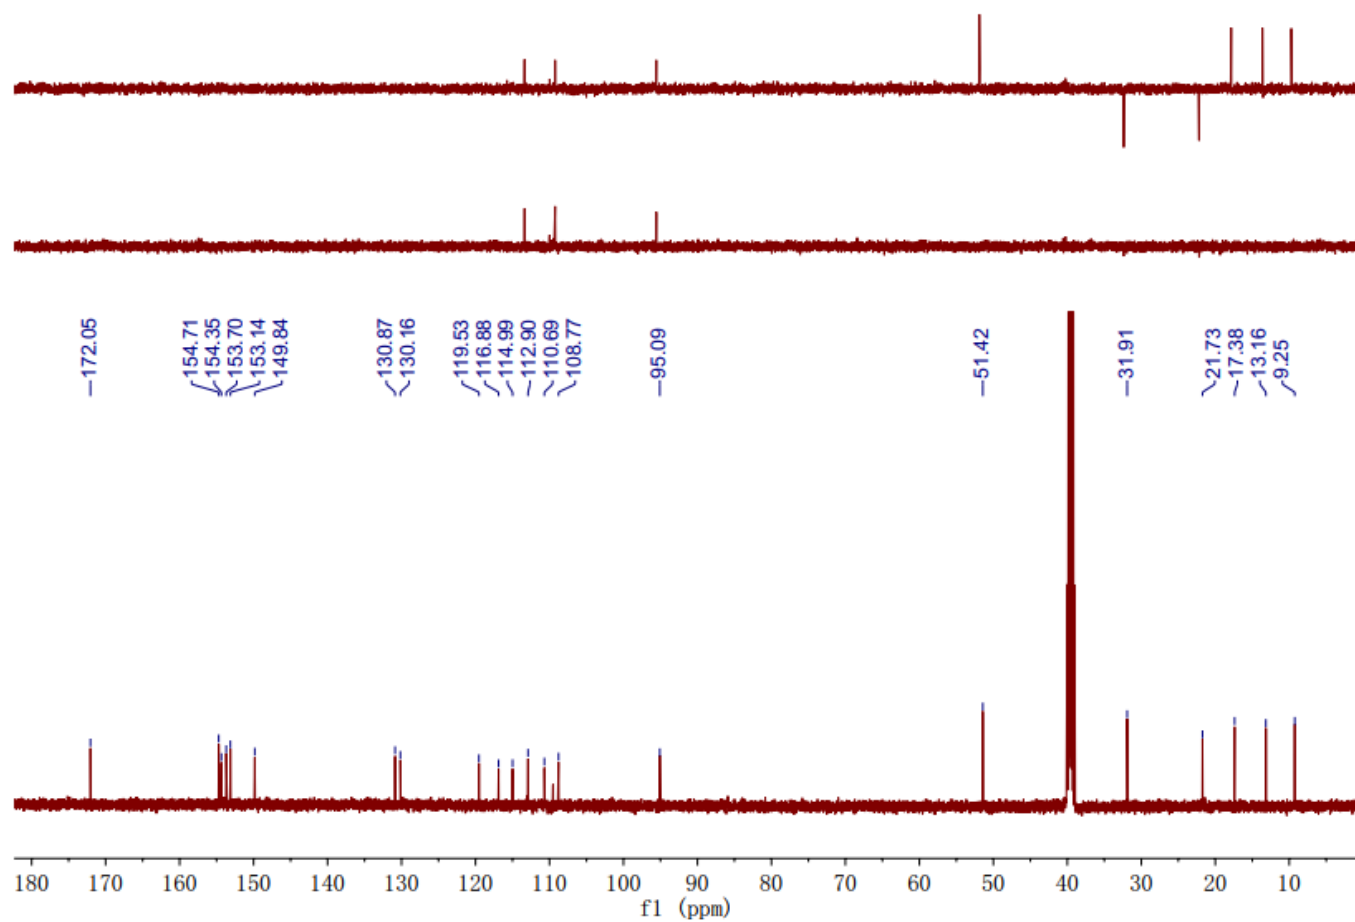

**Figure S4.** COSY spectrum of compound **1**.

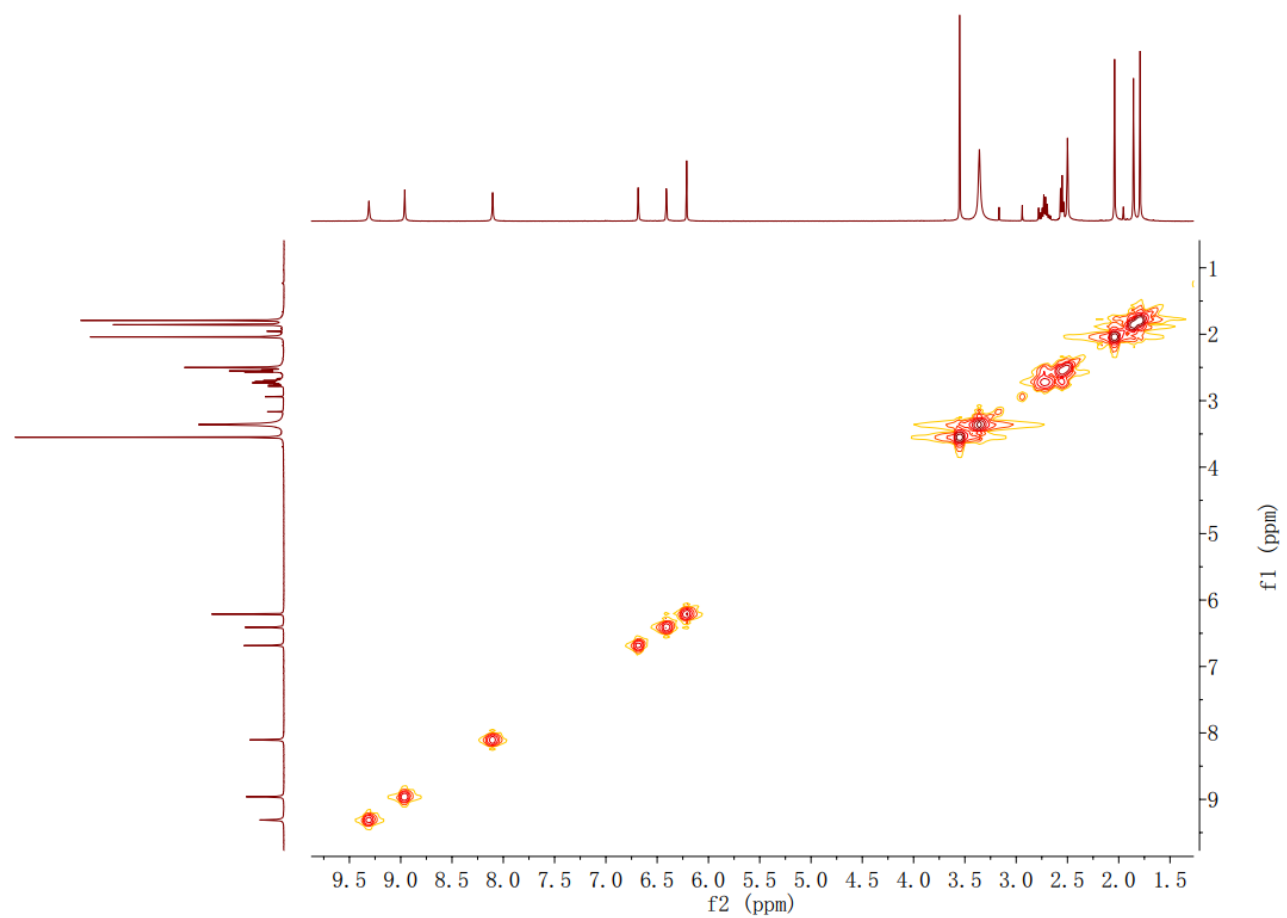

**Figure S5.** HSQC spectrum of compound **1**.

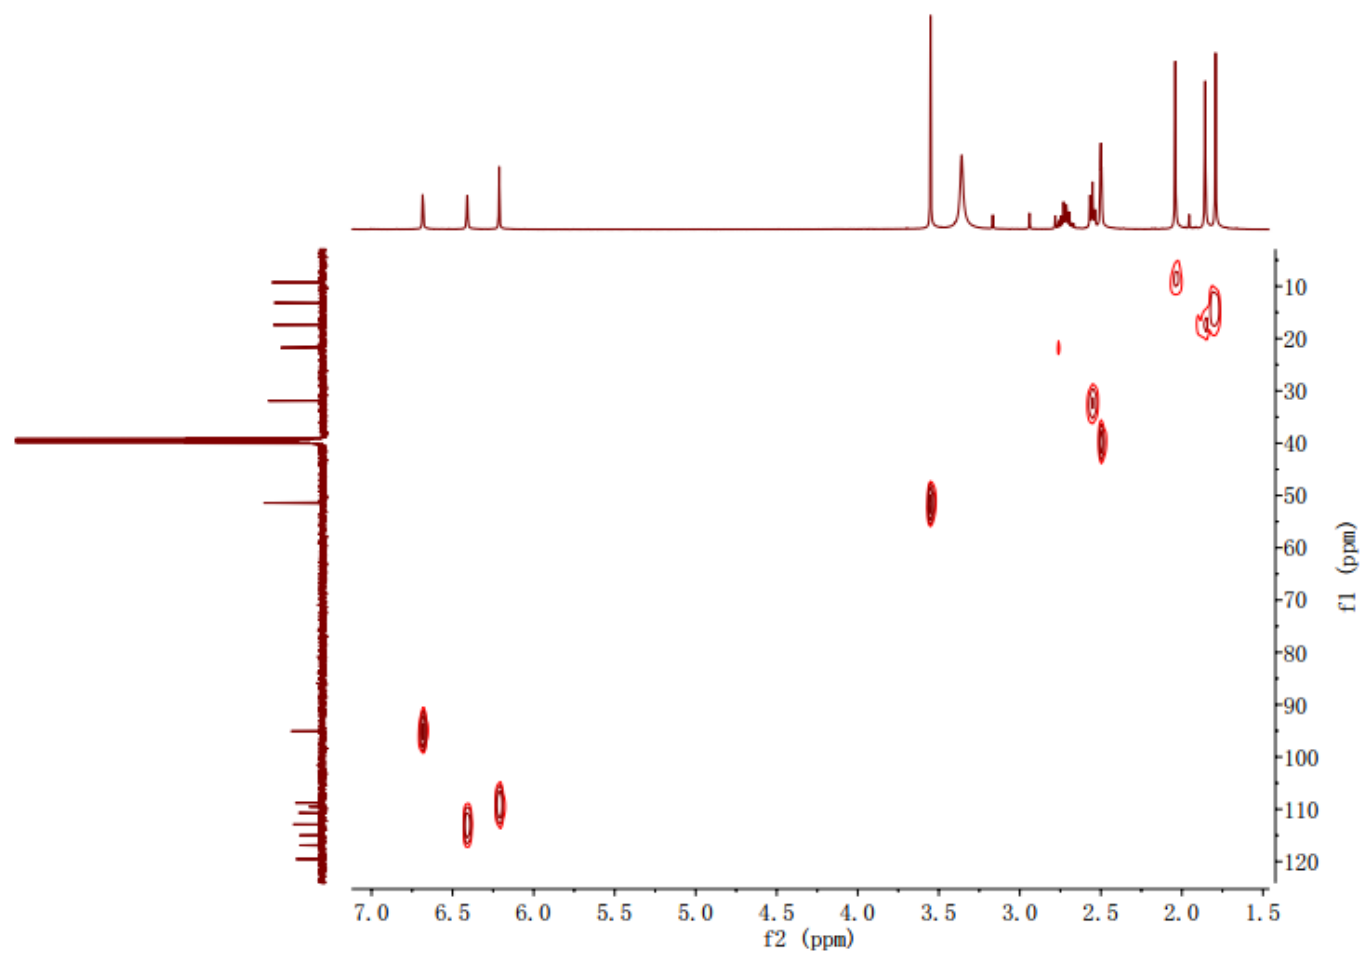

**Figure S6.** HMBC spectrum of compound **1**.

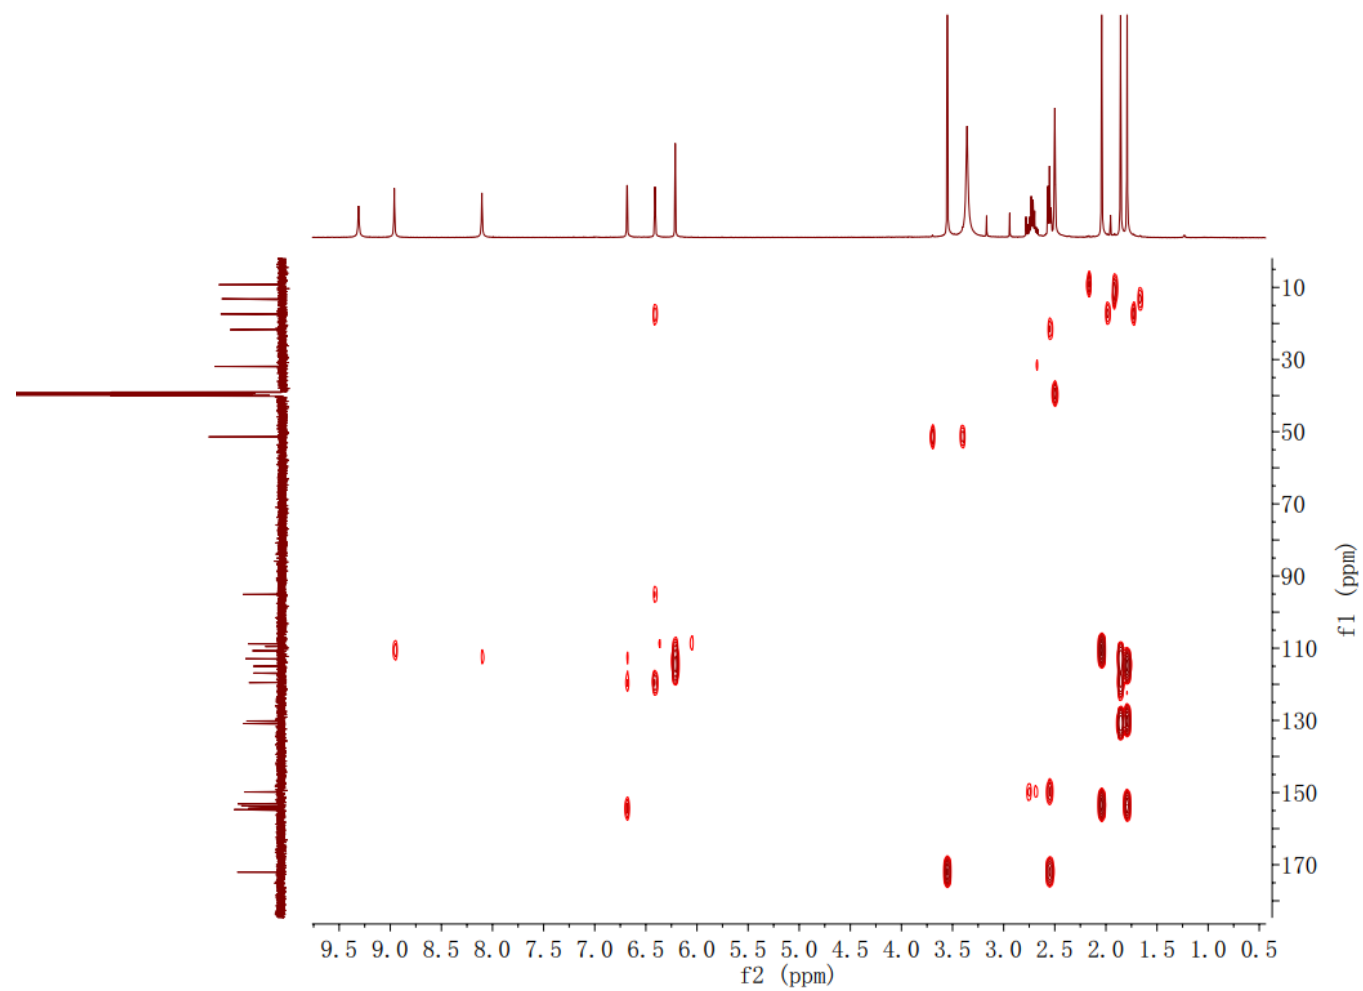



Figure S7. HRESIMS spectrum of compound 2.

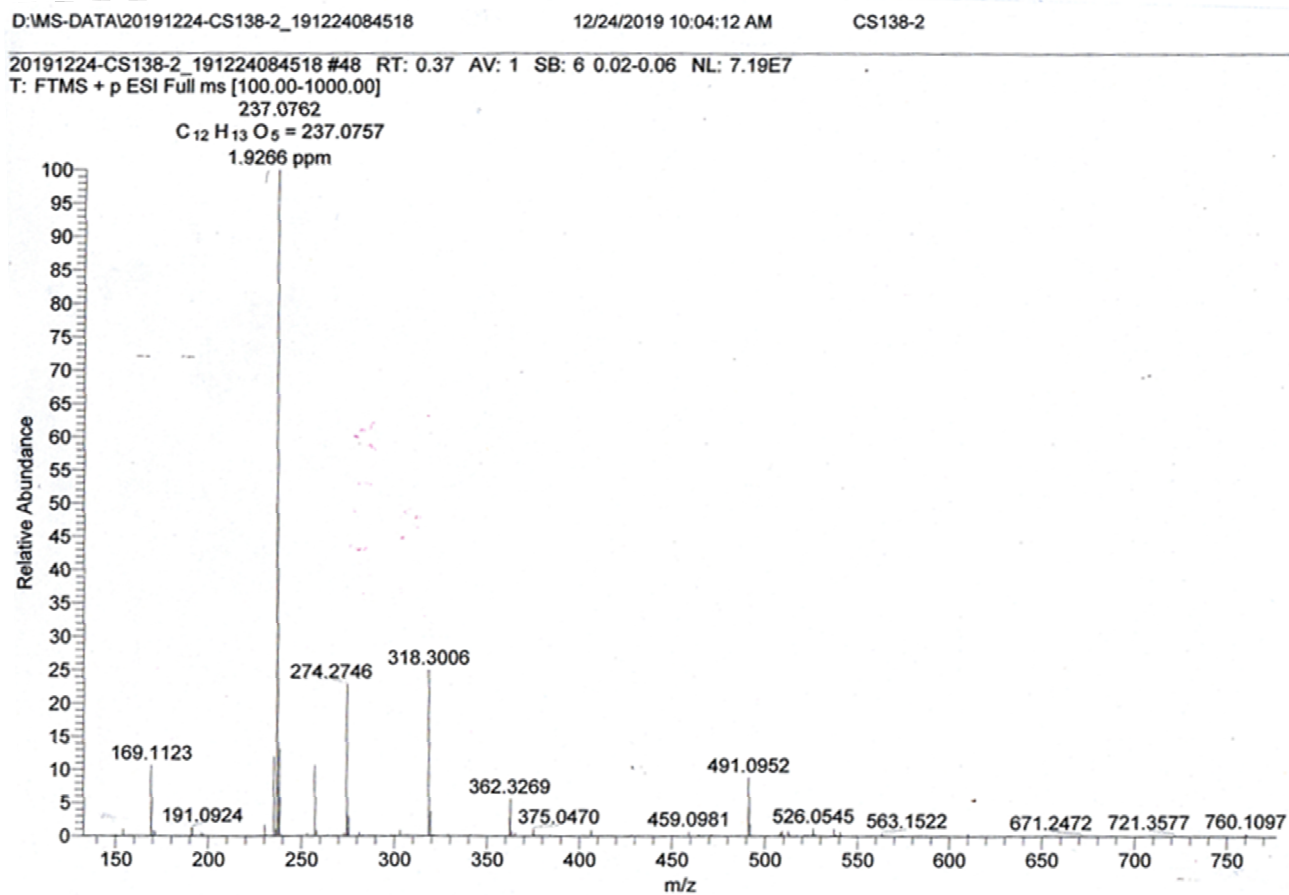

**Figure S8.**  $^1\text{H}$  NMR (500 MHz,  $\text{DMSO}-d_6$ ) spectrum of compound **2**.

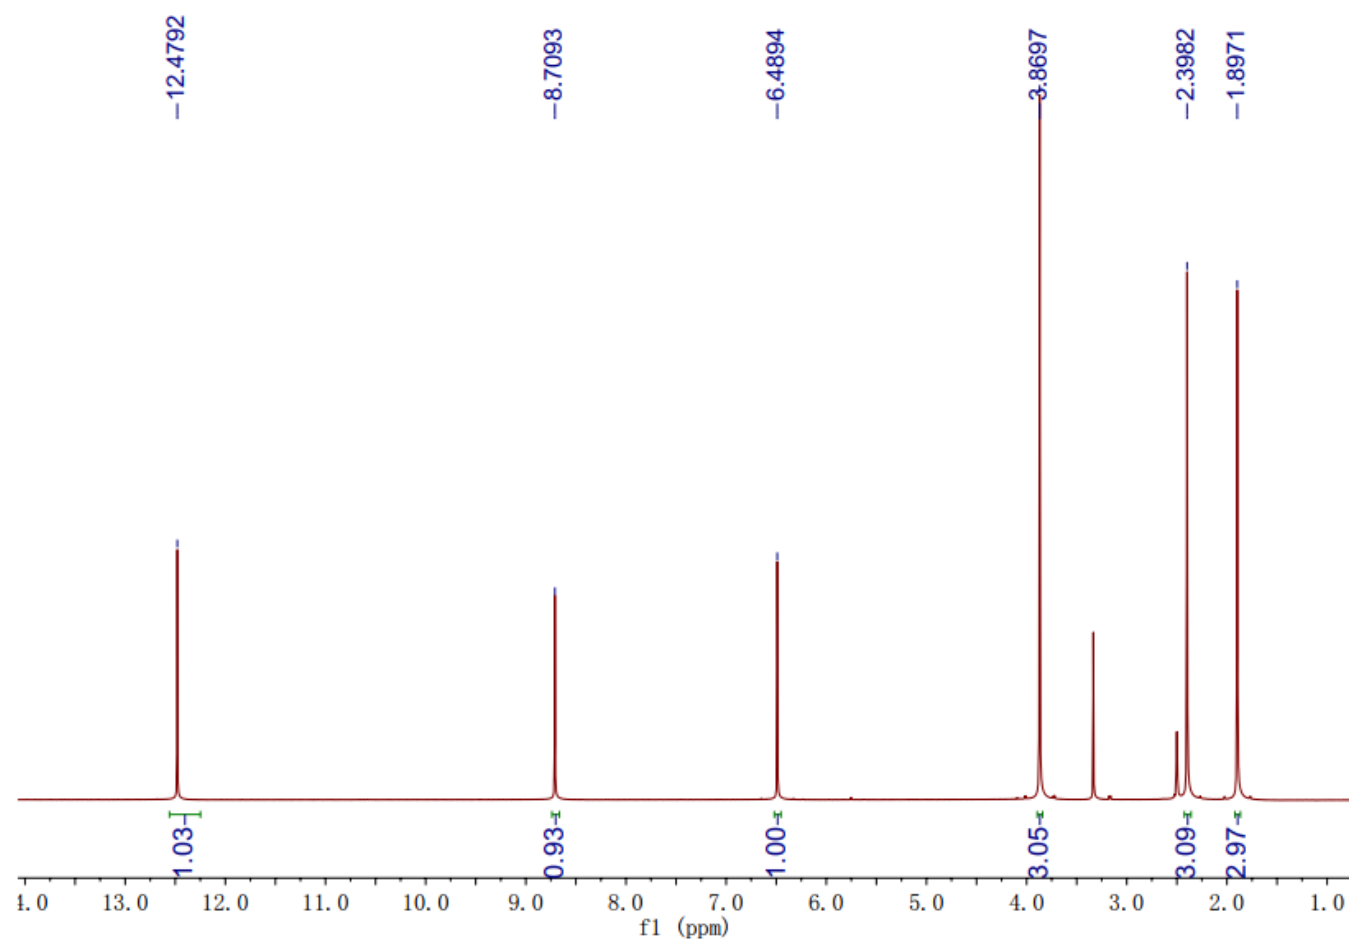

**Figure S9.**  $^{13}\text{C}$  NMR (125 MHz,  $\text{DMSO-}d_6$ ) and DEPT spectra of compound **2**.

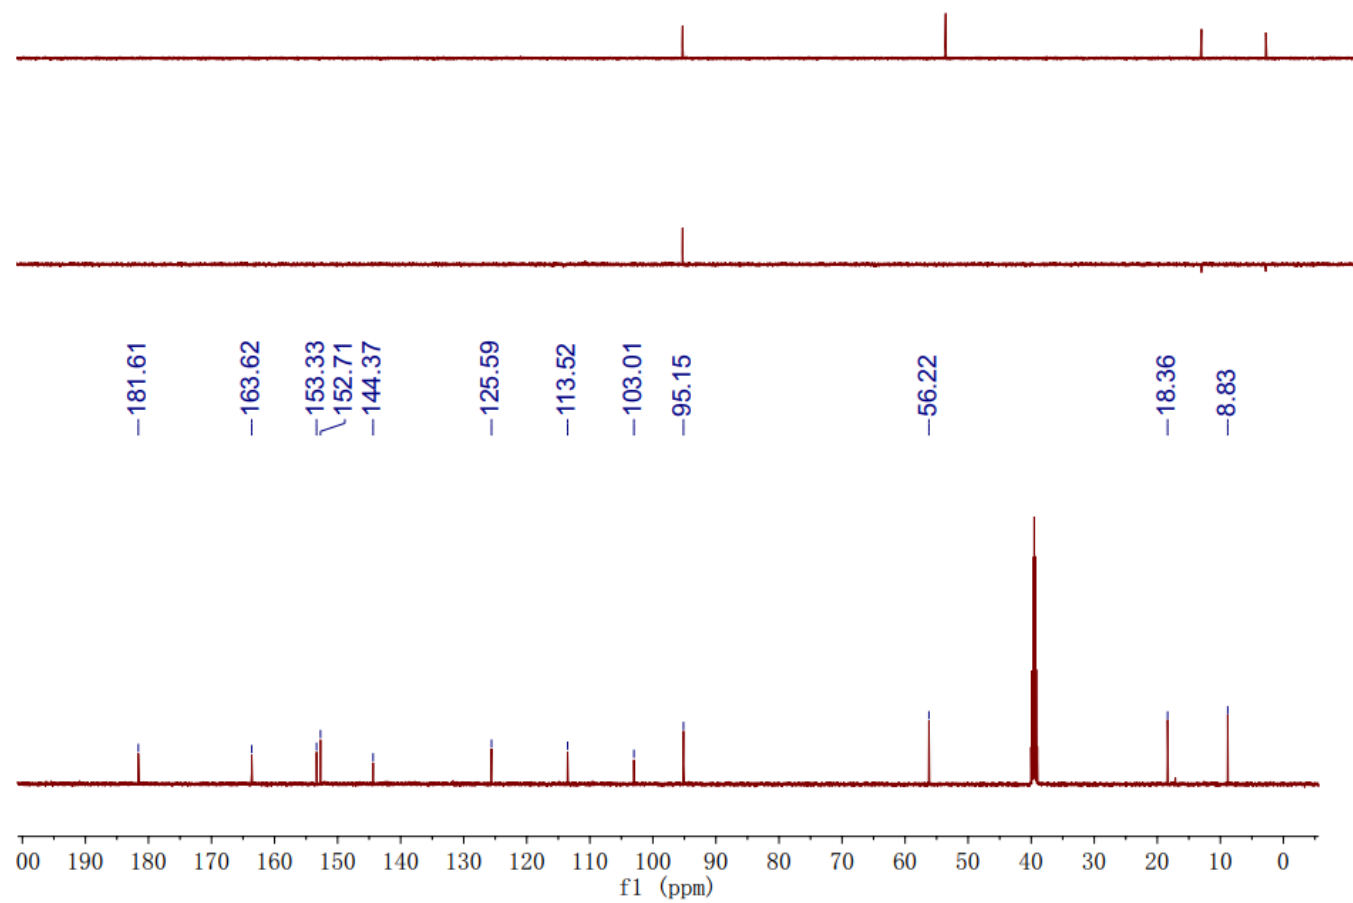

**Figure S10.** HSQC spectrum of compound 2.

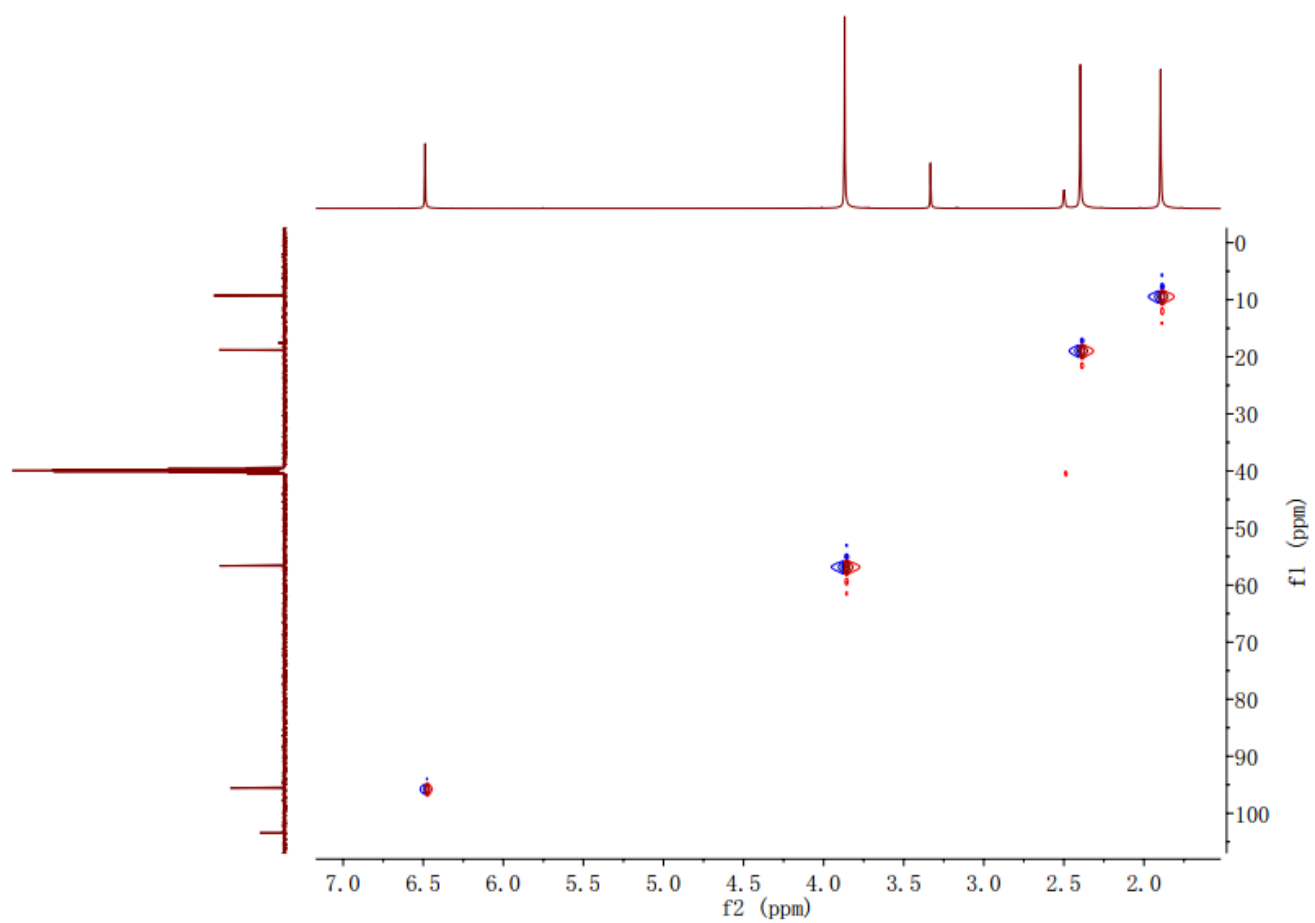

**Figure S11.** HMBC spectrum of compound **2**.

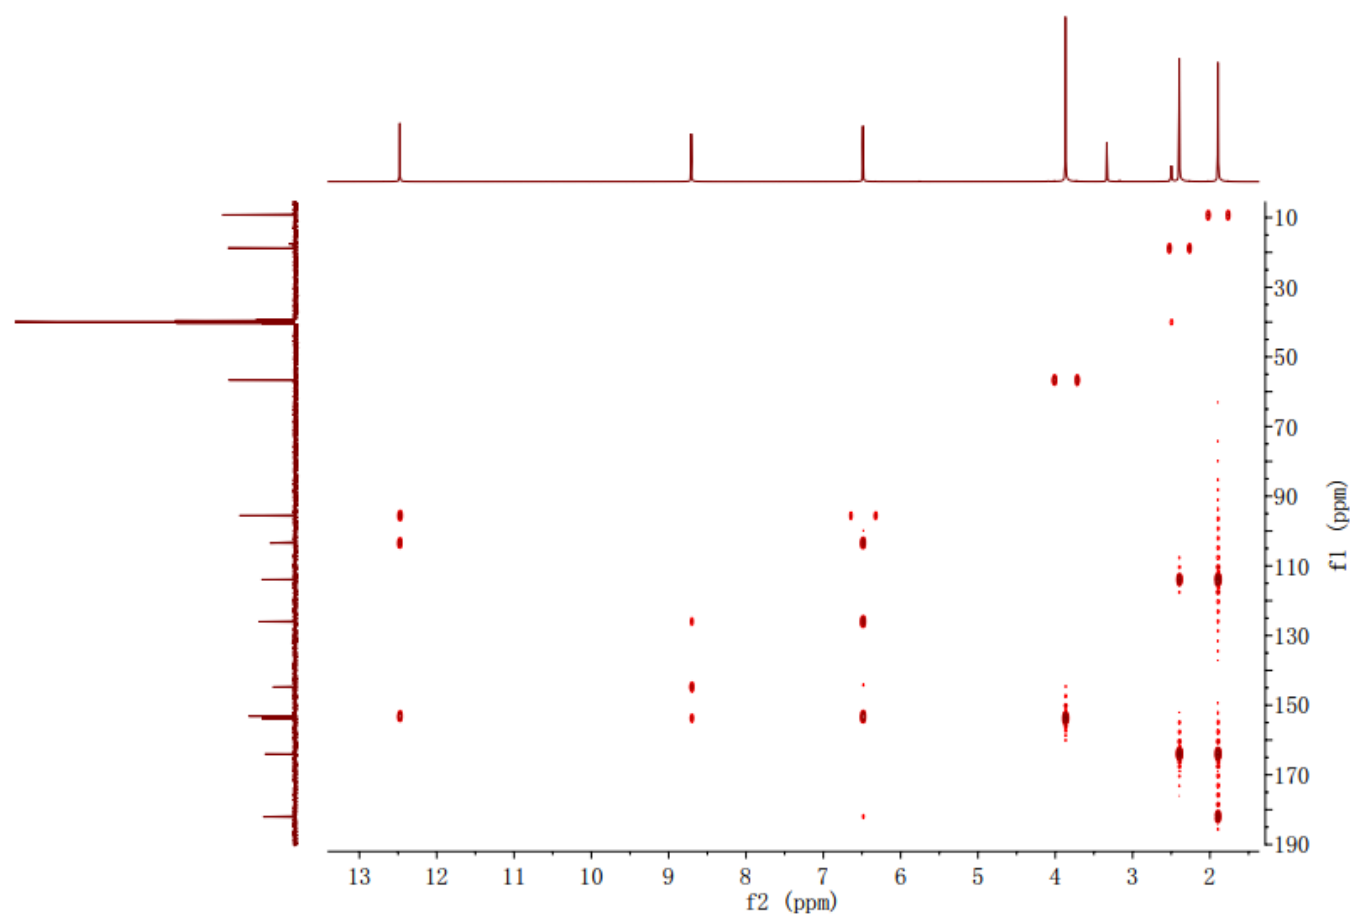

**Figure S12.** Crystal packing of compound **2** at 293(2) K.

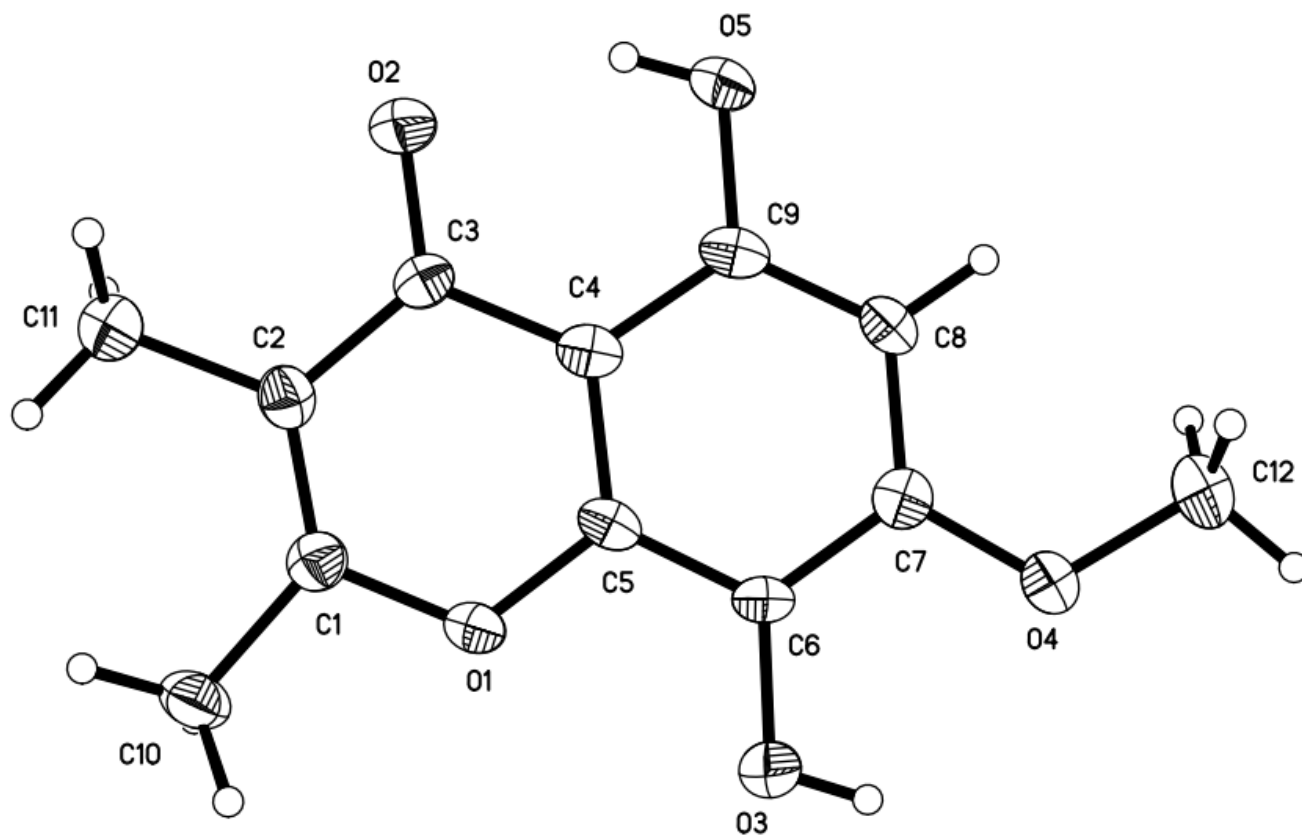

Figure S13. HRESIMS spectrum of compound 3.

D:\MS-DATA\20191129-C5138-3\_191129102534

11/29/2019 10:44:36 AM

C5138-3

20191129-C5138-3\_191129102534 #57 RT: 0.47 AV: 1 SB: 3 0.01-0.02 NL: 1.23E7

T: FTMS + p ESI Full ms [200.00-1000.00]

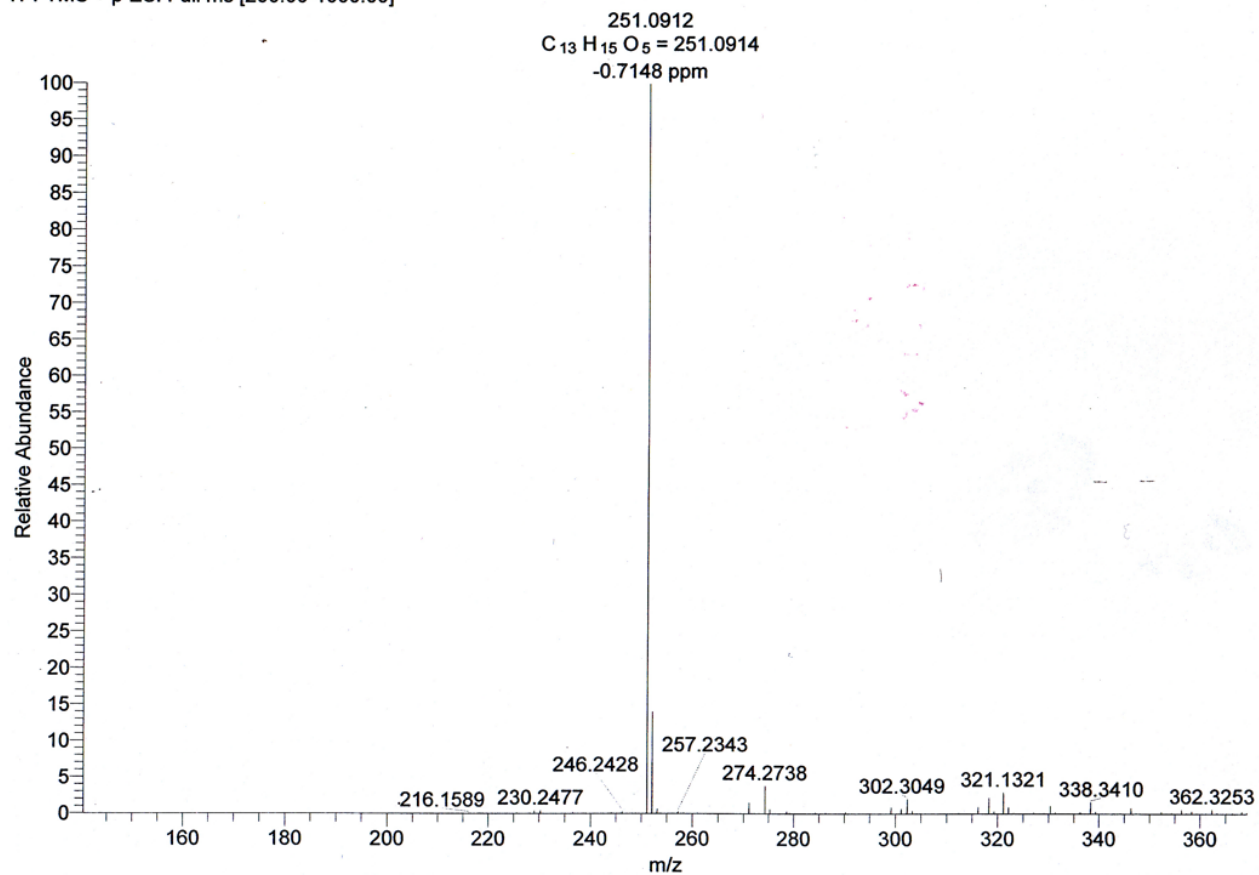

**Figure S14.**  $^1\text{H}$  NMR (500 MHz,  $\text{DMSO-}d_6$ ) spectrum of compound **3**.

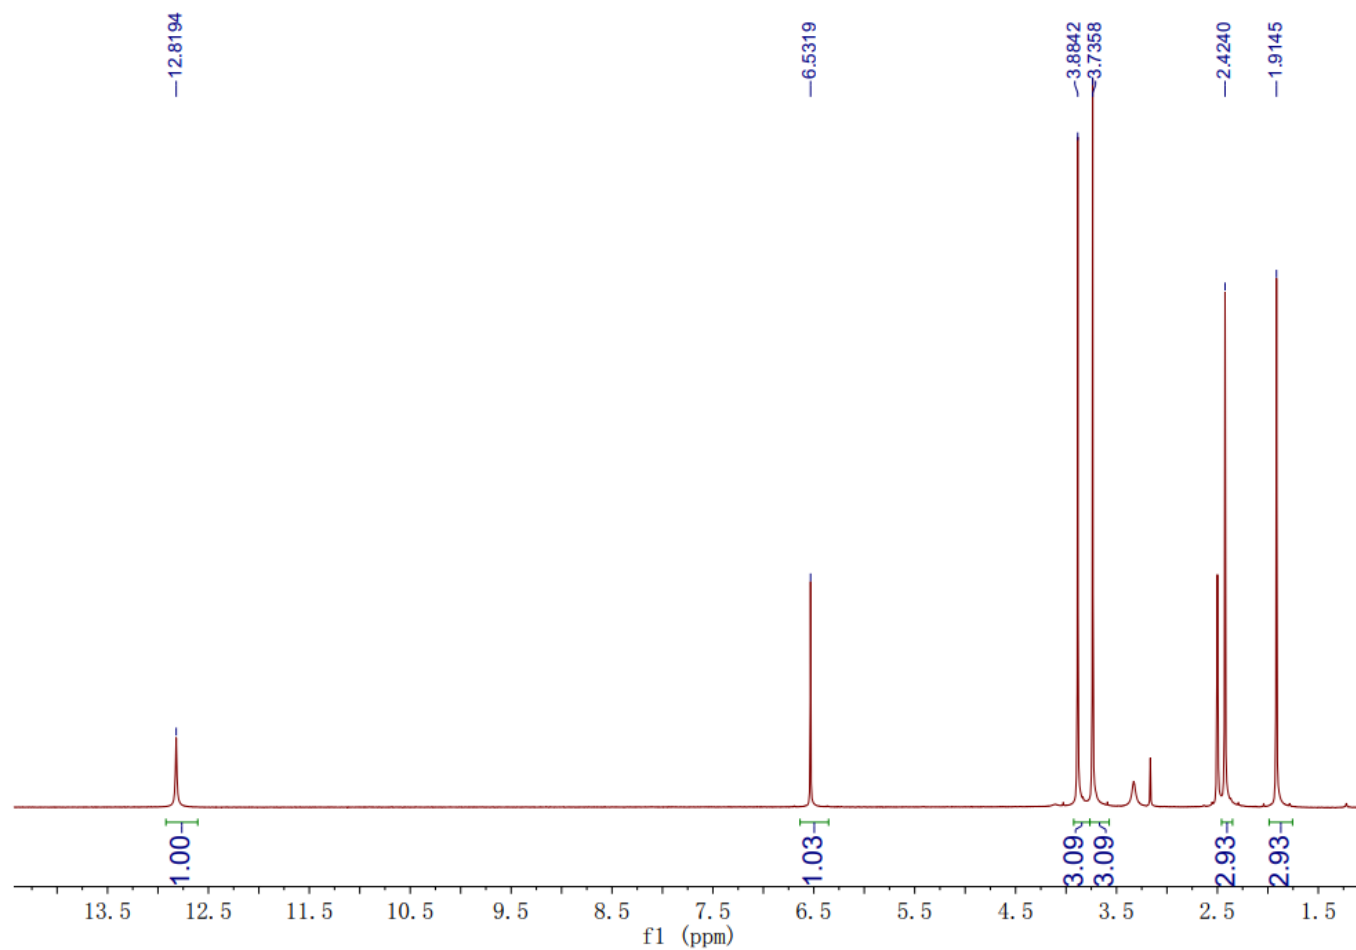



**Figure S15.**  $^{13}\text{C}$  NMR (125 MHz,  $\text{DMSO-}d_6$ ) and DEPT spectra of compound **3**.

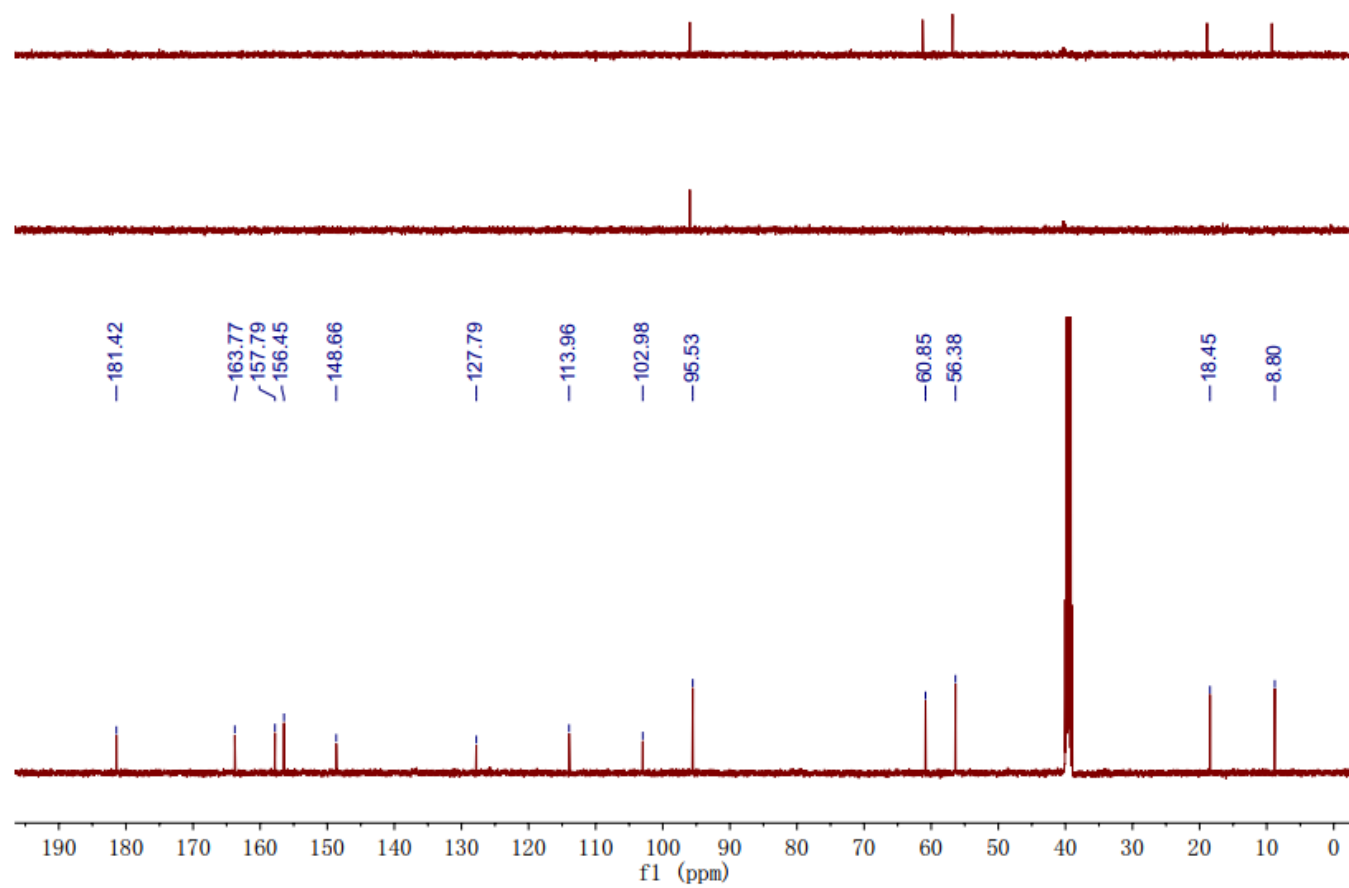

**Figure S16.** HSQC spectrum of compound 3.

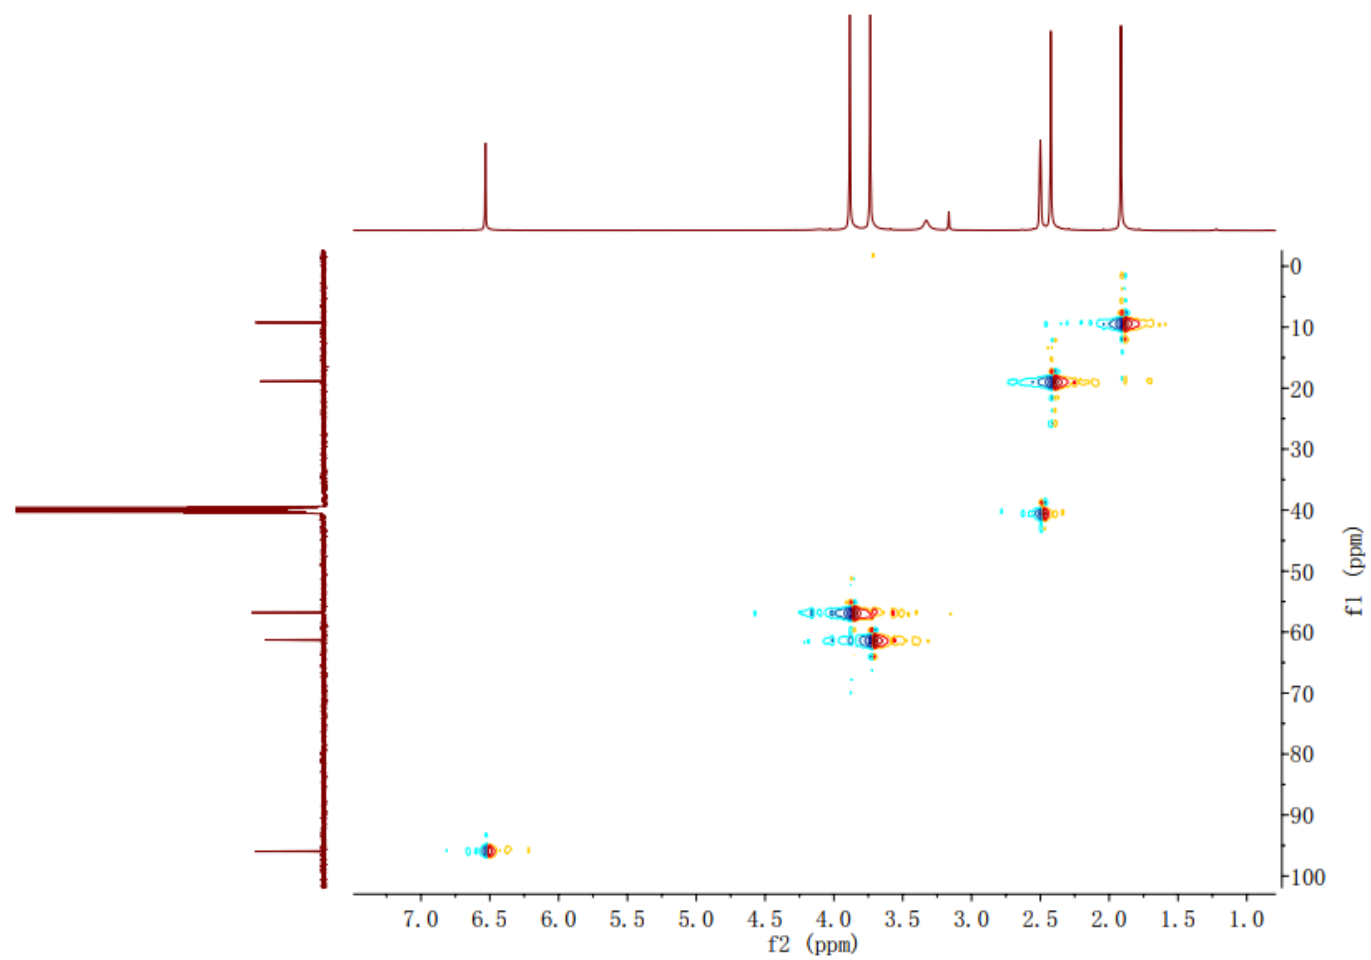

**Figure S17.** HMBC spectrum of compound **3**.

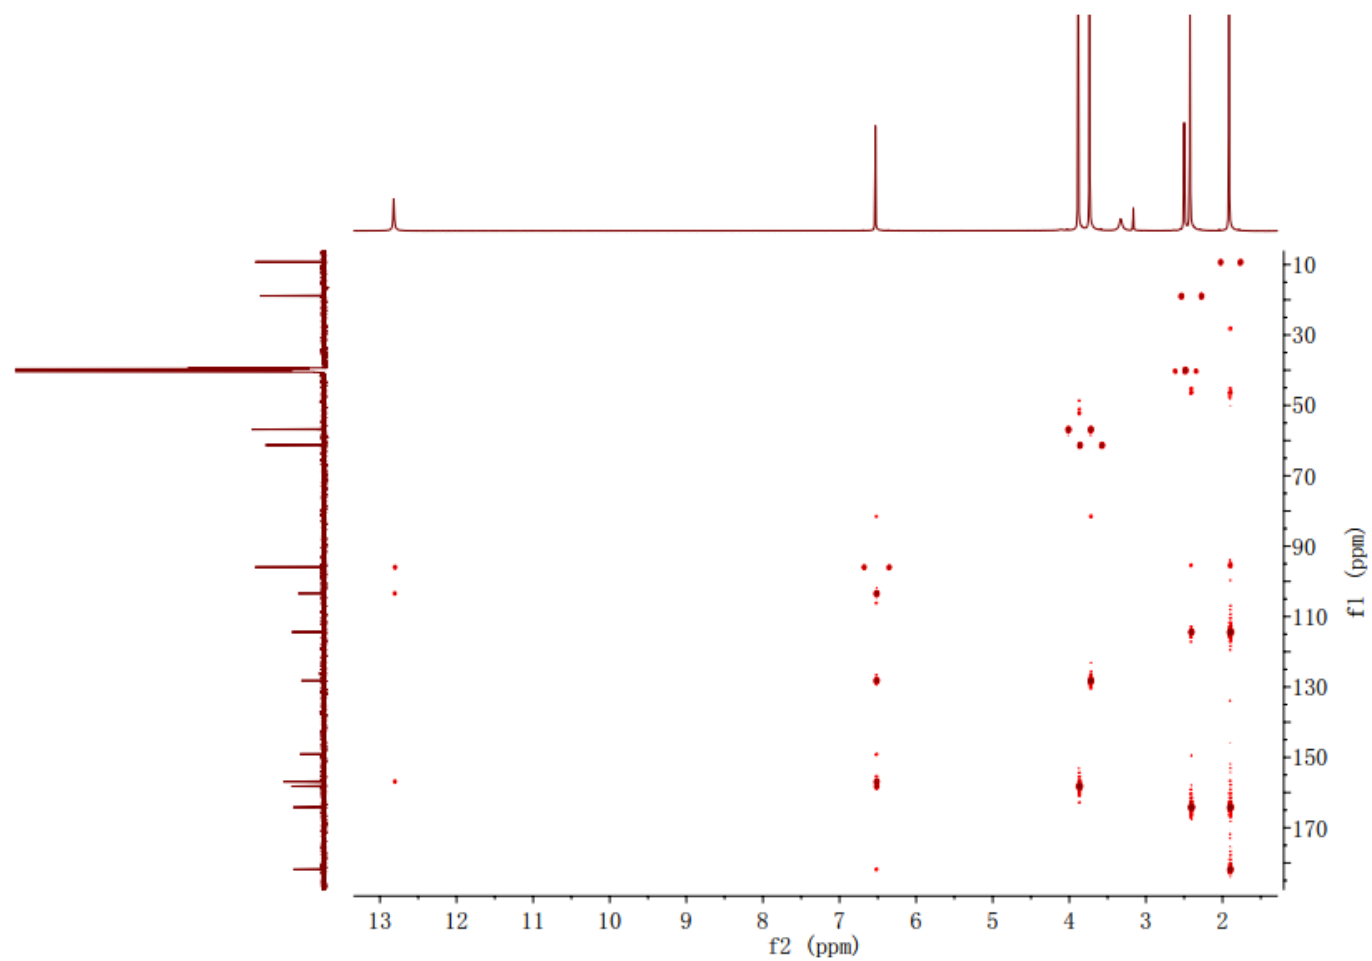

**Figure S18.** HRESIMS spectrum of compound **4**.

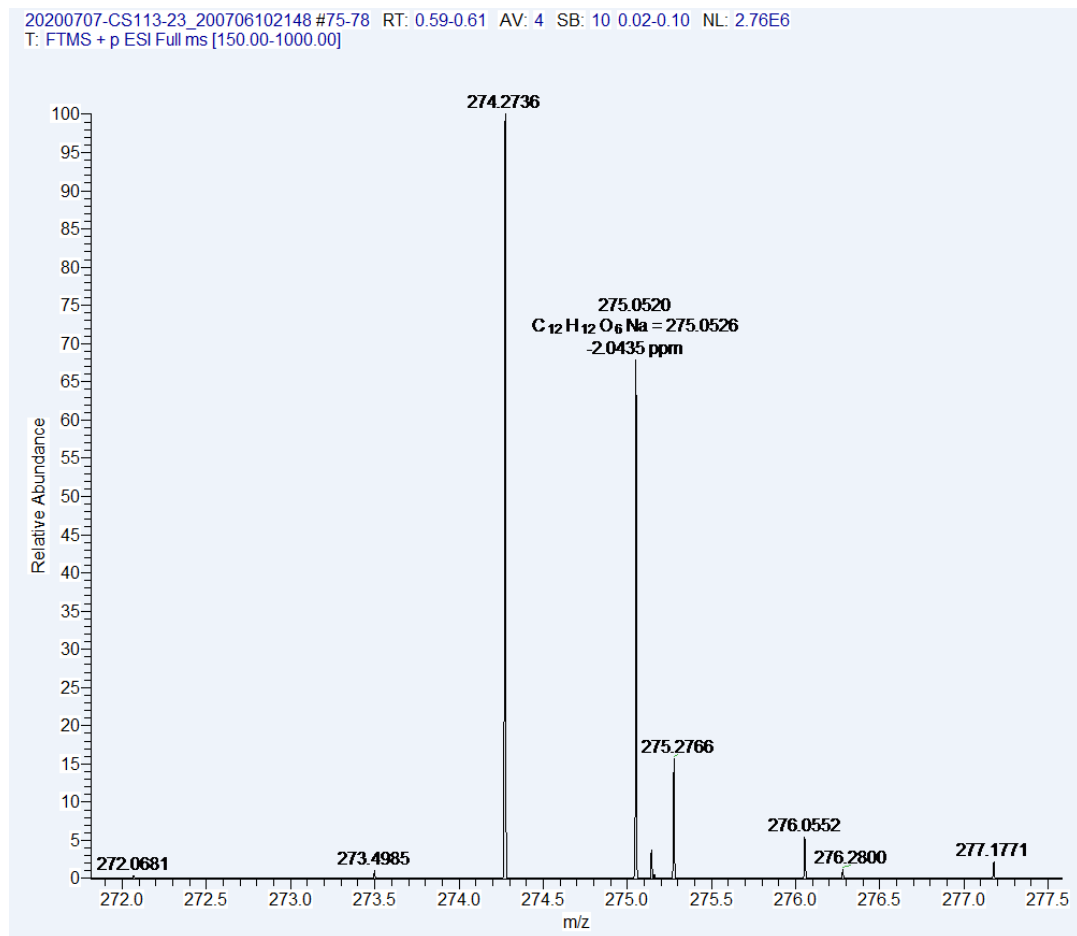

**Figure S19.**  $^1\text{H}$  NMR (500 MHz,  $\text{DMSO-}d_6$ ) spectrum of compound **4**.

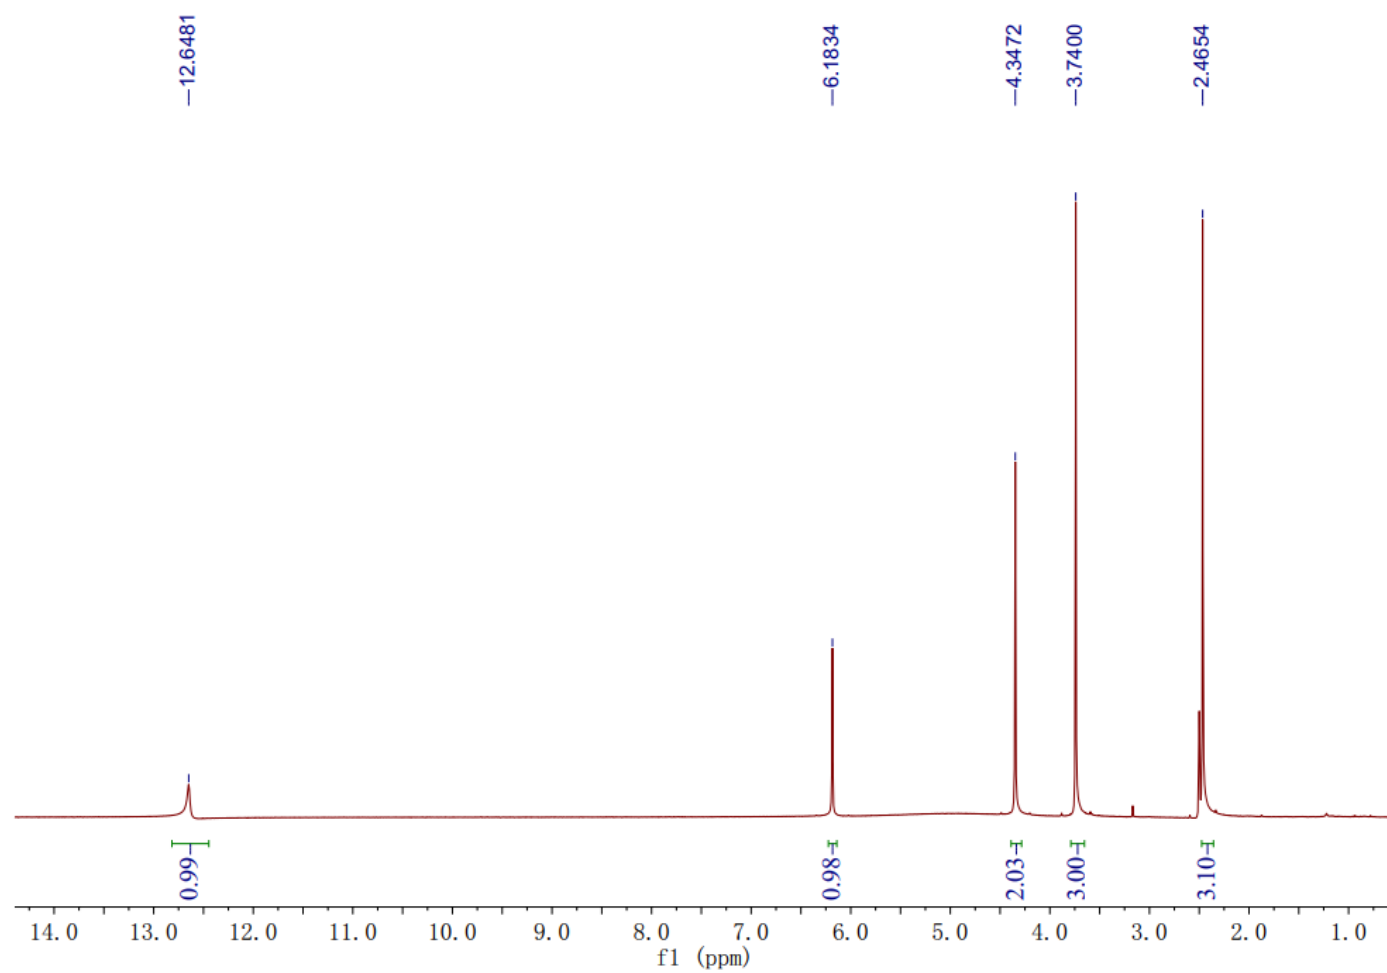

**Figure S20.**  $^{13}\text{C}$  NMR (125 MHz,  $\text{DMSO-}d_6$ ) and DEPT spectra of compound **4**.

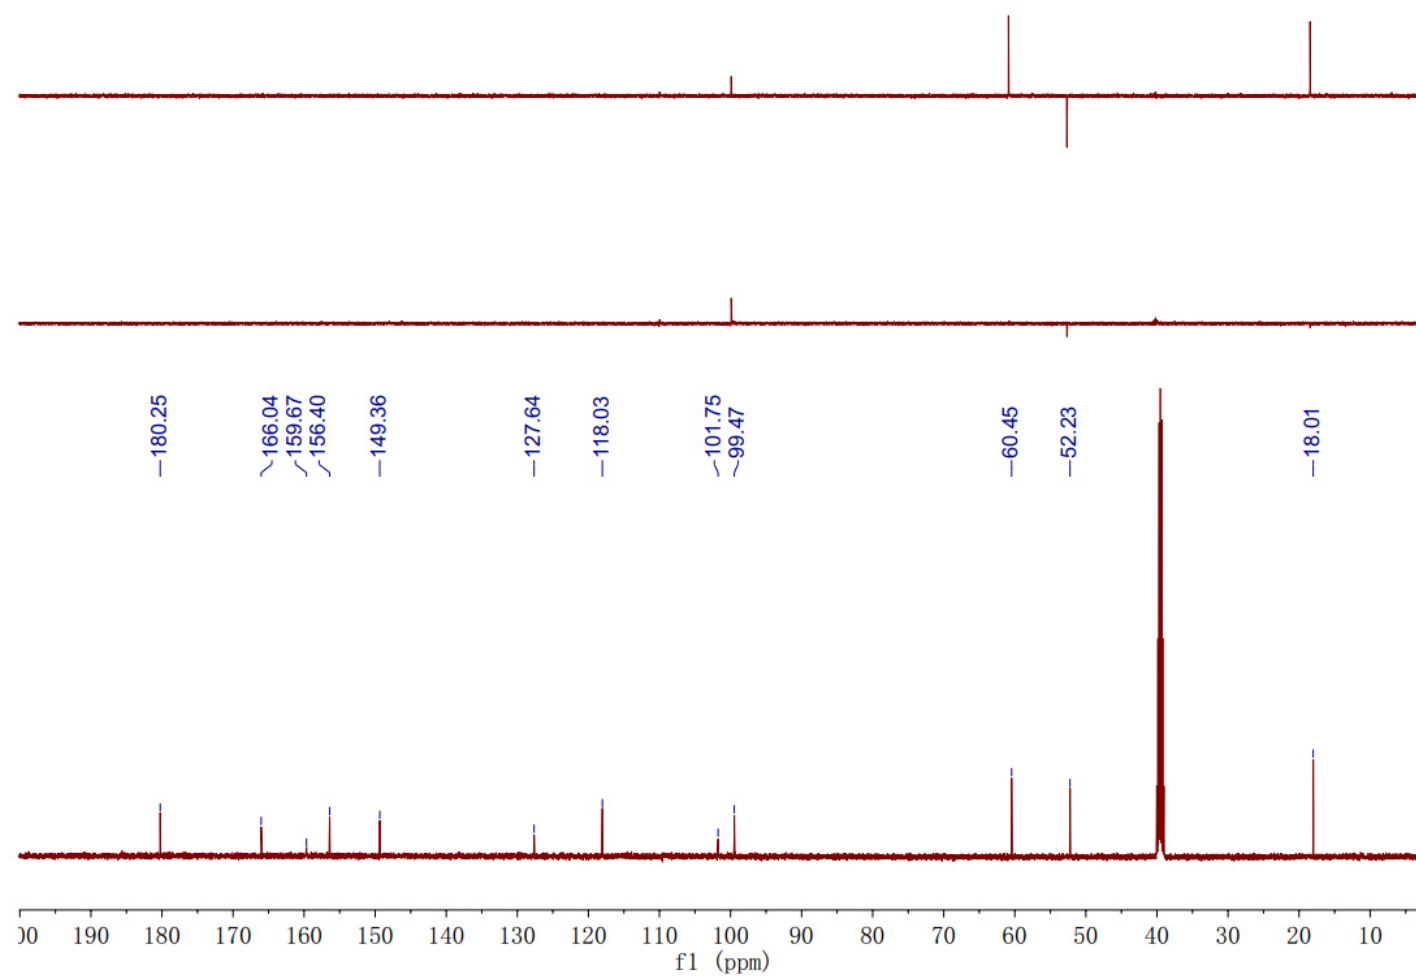

**Figure S21.** HSQC spectrum of compound **4**.

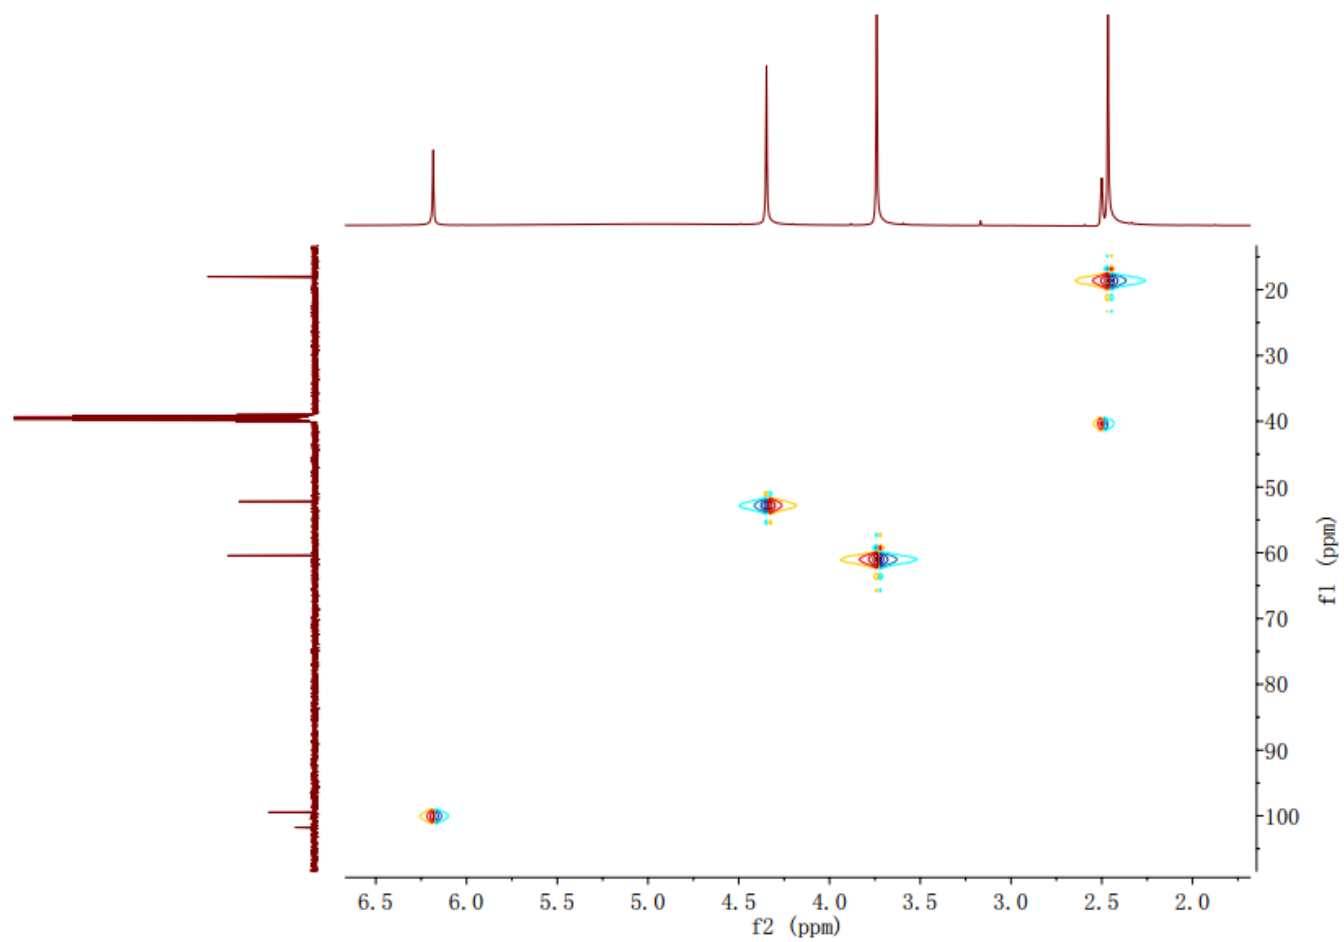

**Figure S22.** HMBC spectrum of compound **4**.

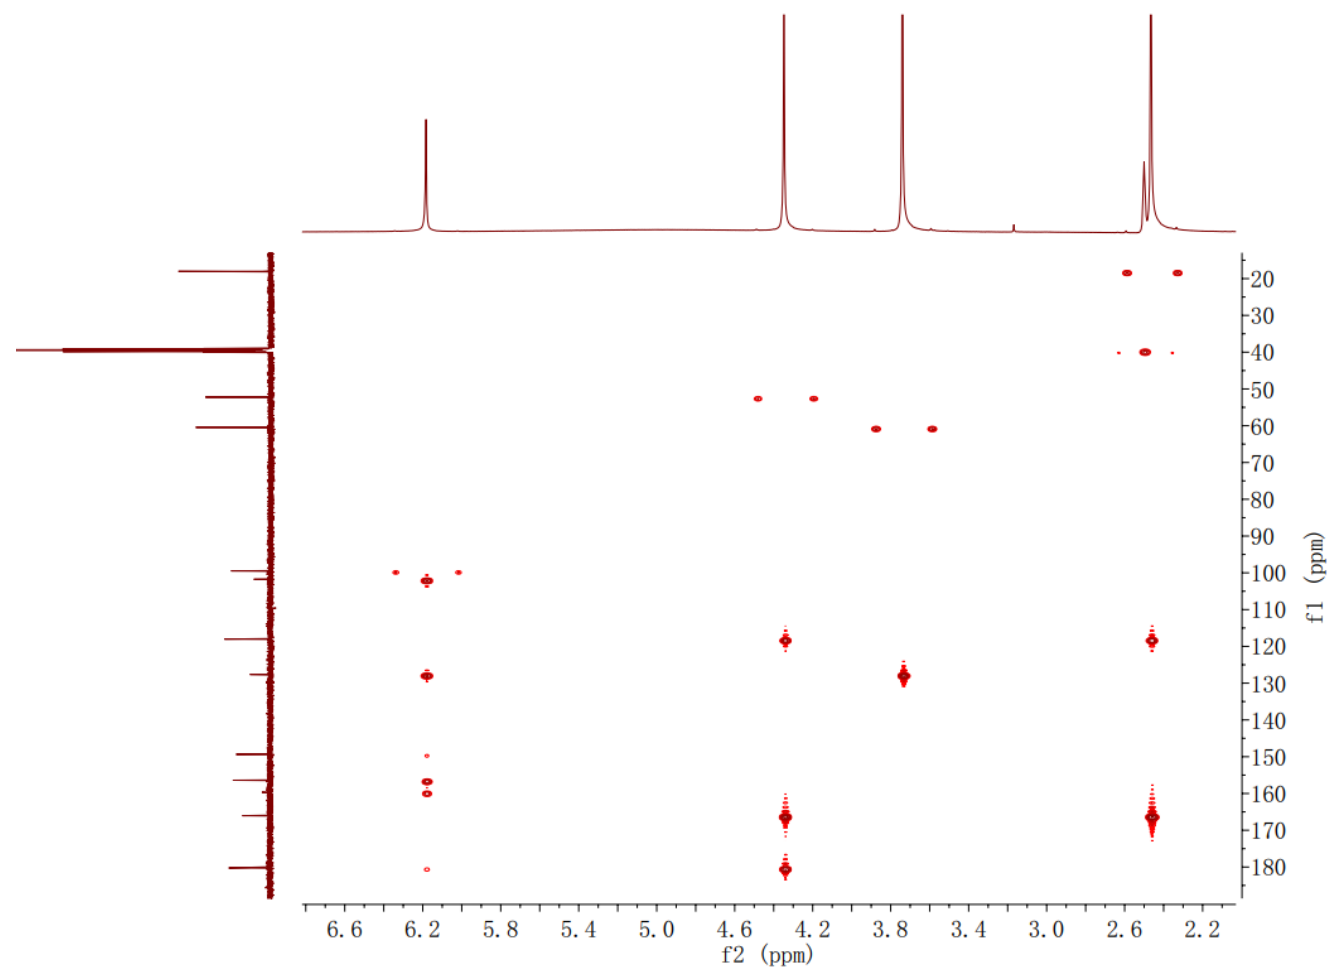



**Figure S23.** Crystal packing of compound **4** at 296(2) K.

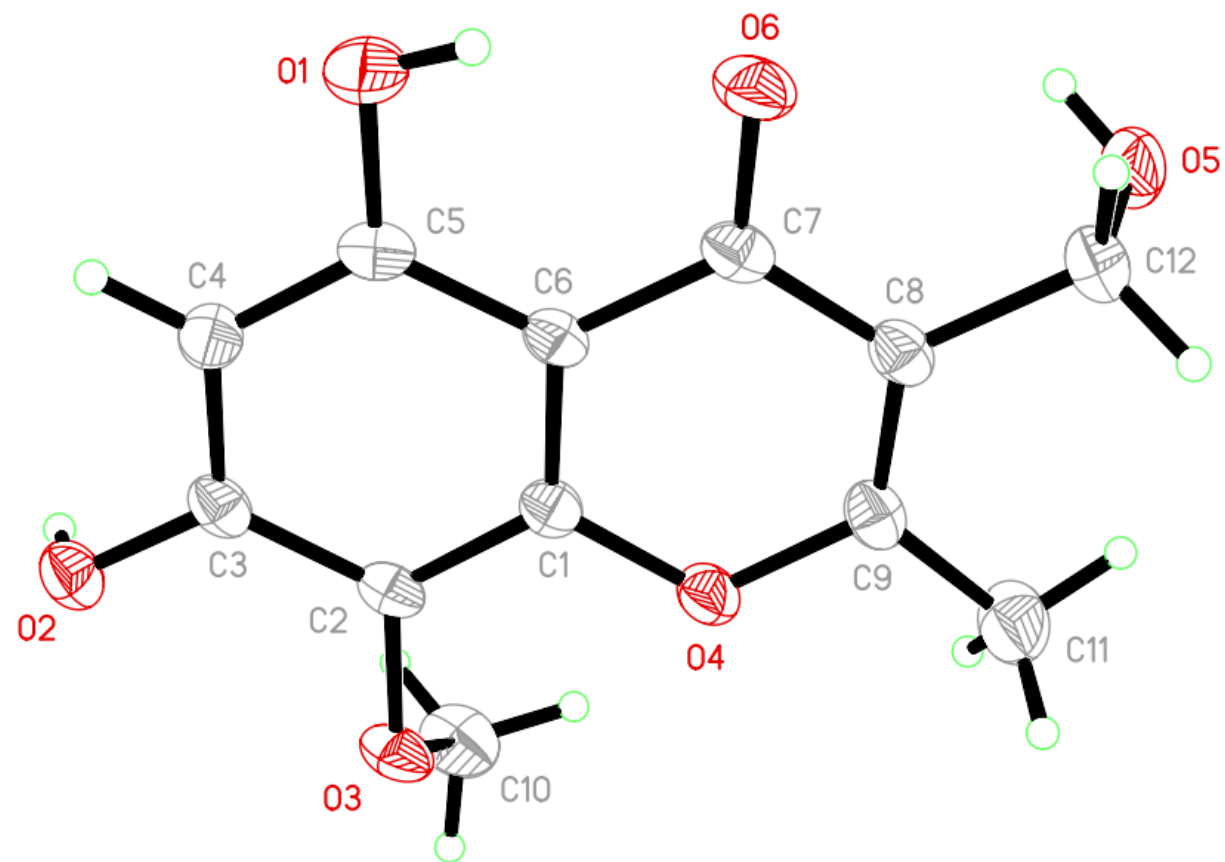

Figure S24. HRESIMS spectrum of compound 5.

20210412-CS138-50\_210412103730 #31-32 RT: 0.49-0.50 AV: 2 NL: 3.22E5  
T: FTMS - p ESI Full ms [150.00-1000.00]

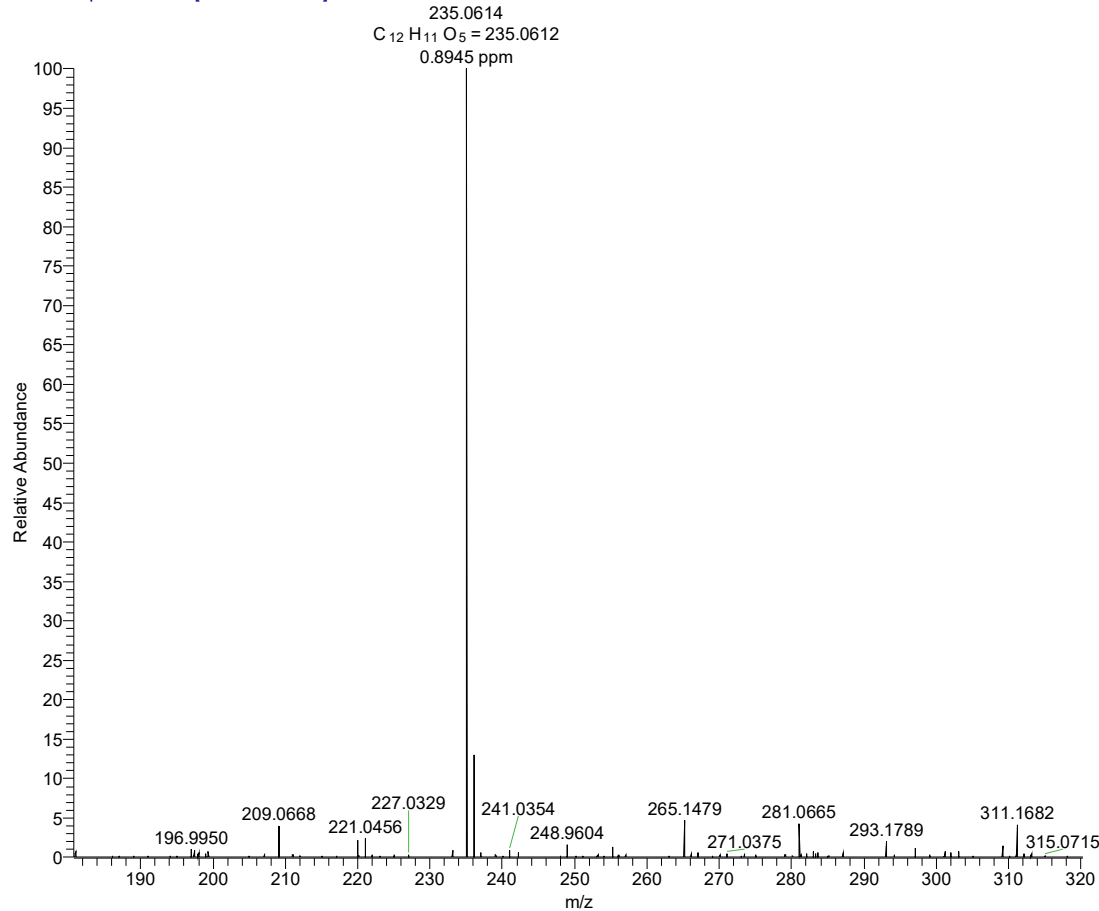

**Figure S25.**  $^1\text{H}$  NMR (500 MHz,  $\text{DMSO-}d_6$ ) spectrum of compound 5.

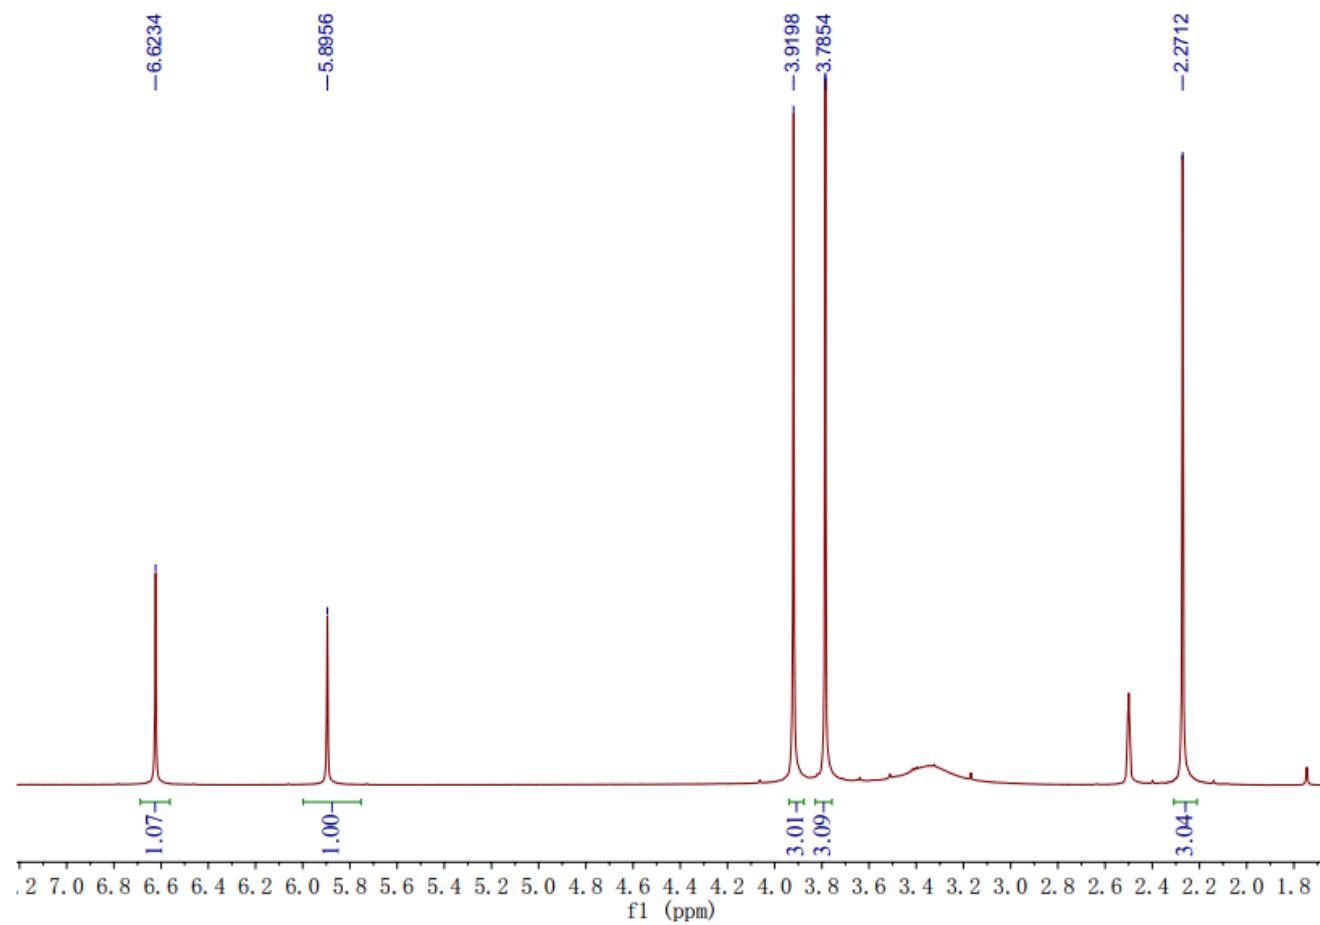

**Figure S26.**  $^{13}\text{C}$  NMR (125 MHz,  $\text{DMSO-}d_6$ ) and DEPT spectra of compound 5.

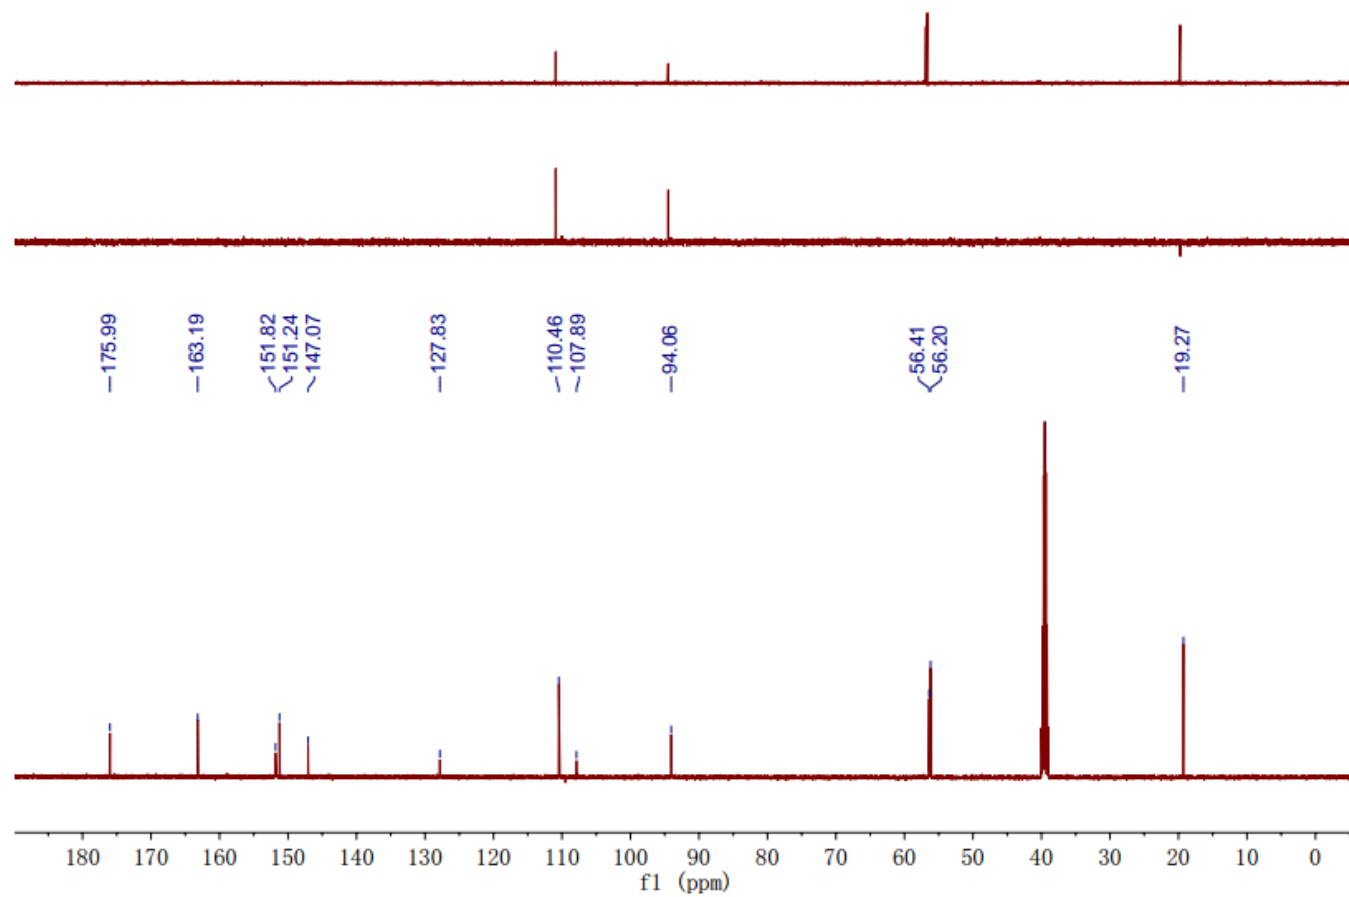

Figure S27. HSQC spectrum of compound 5.

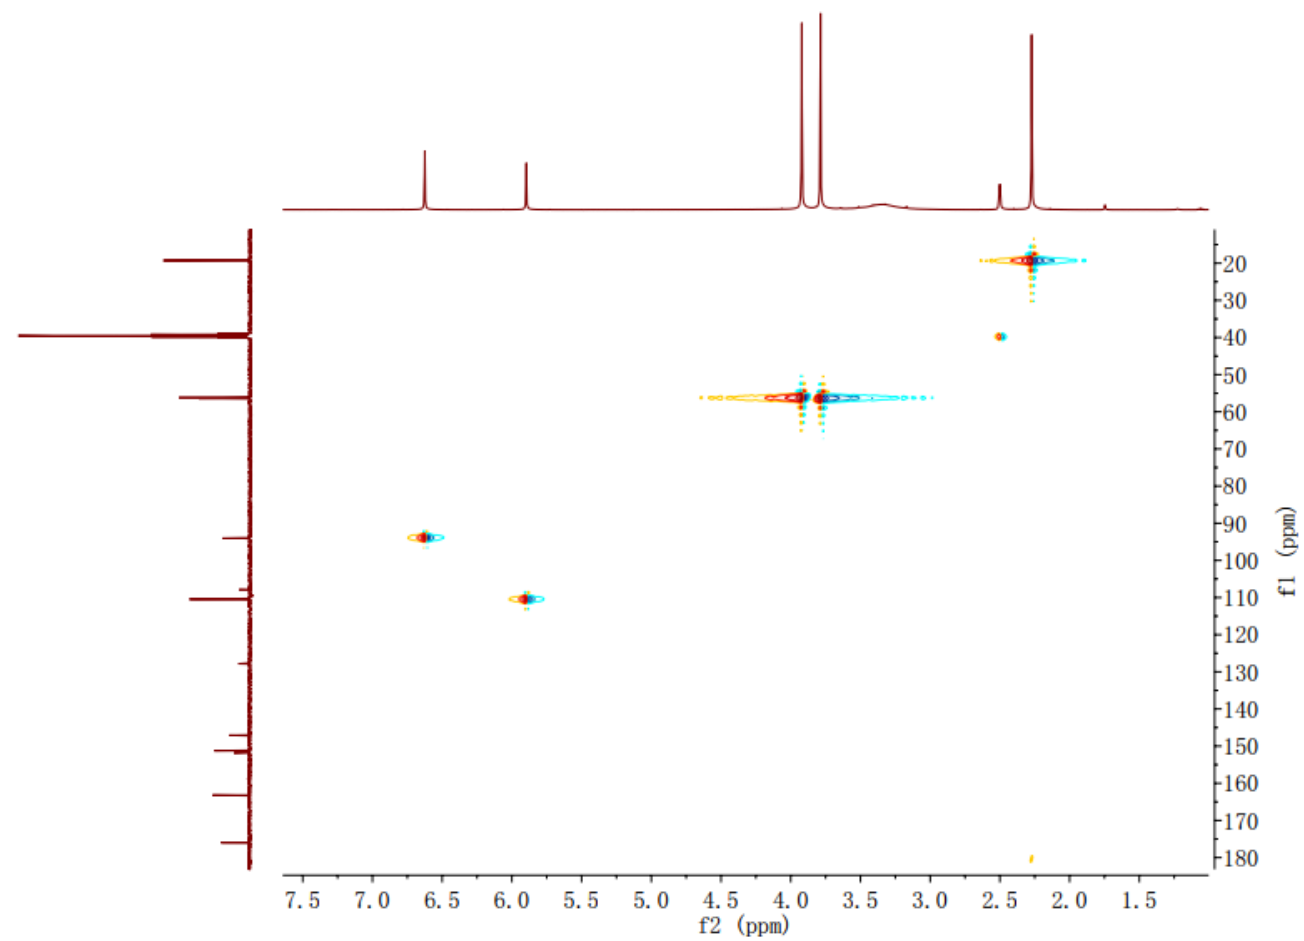

**Figure S28.** HMBC spectrum of compound **5**.

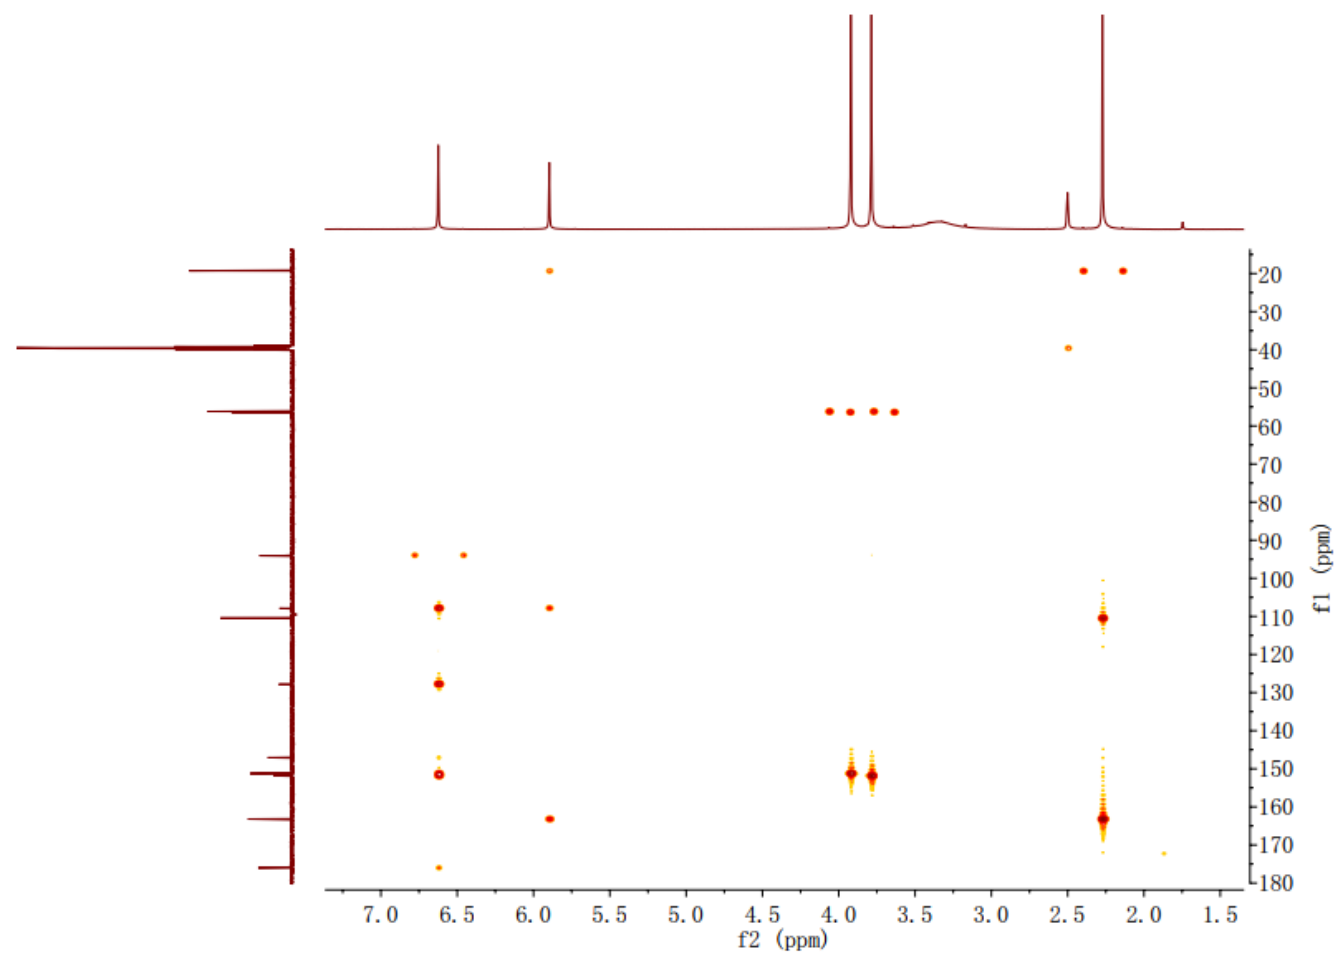

**Figure S29.** Crystal packing of compound **5** at 298(2) K.

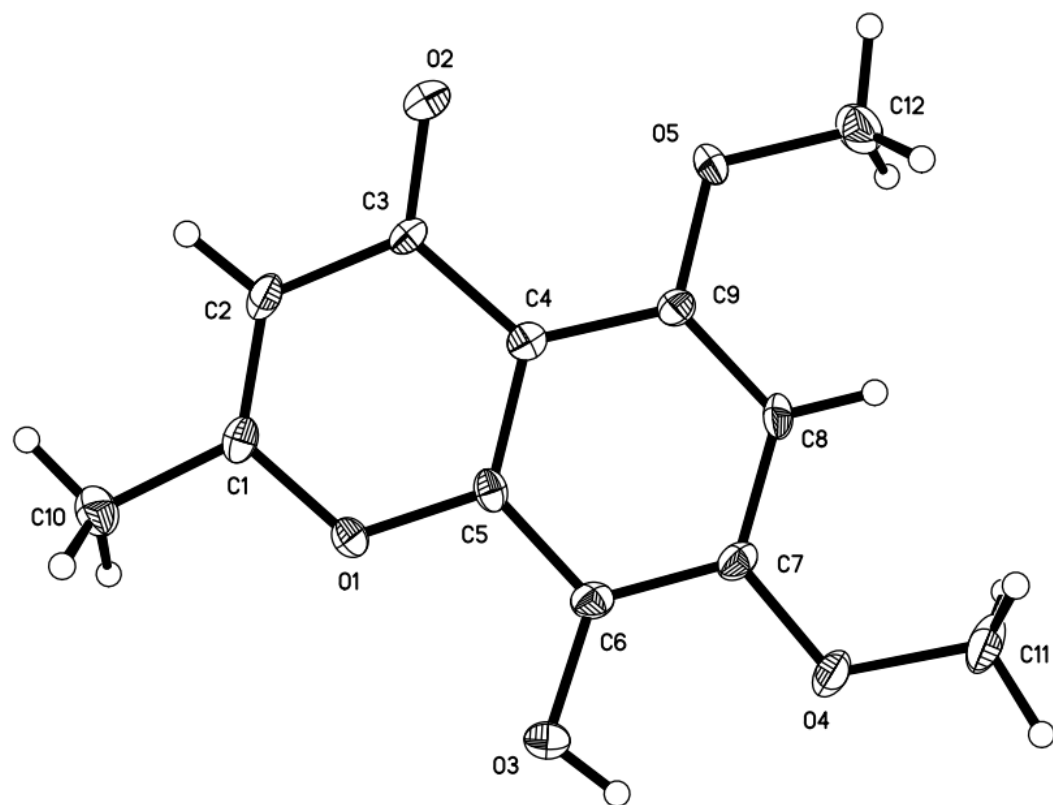

**Figure S30.** HRESIMS spectrum of compound **6**.

20201208-CS138-65\_201208091241 #19 RT: 0.42 AV: 1 NL: 3.52E2  
T: FTMS - p ESI Full ms [50.00-1000.00]

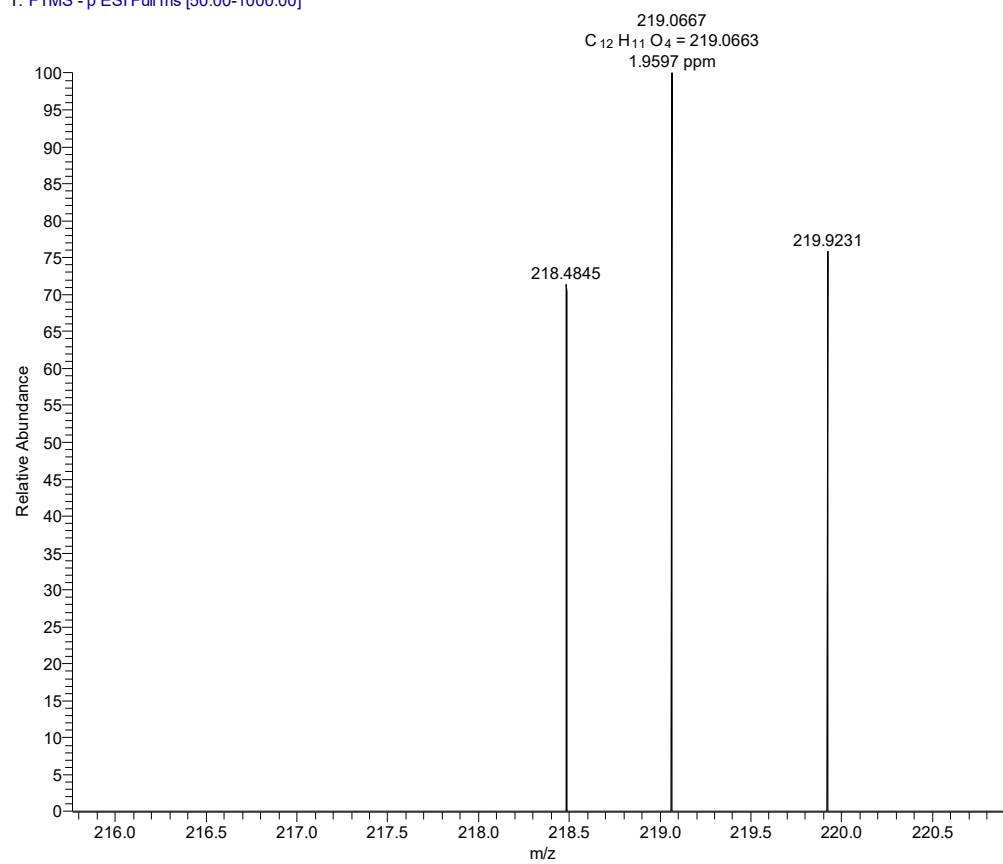



**Figure S31.**  $^1\text{H}$  NMR (500 MHz,  $\text{DMSO}-d_6$ ) spectrum of compound **6**.

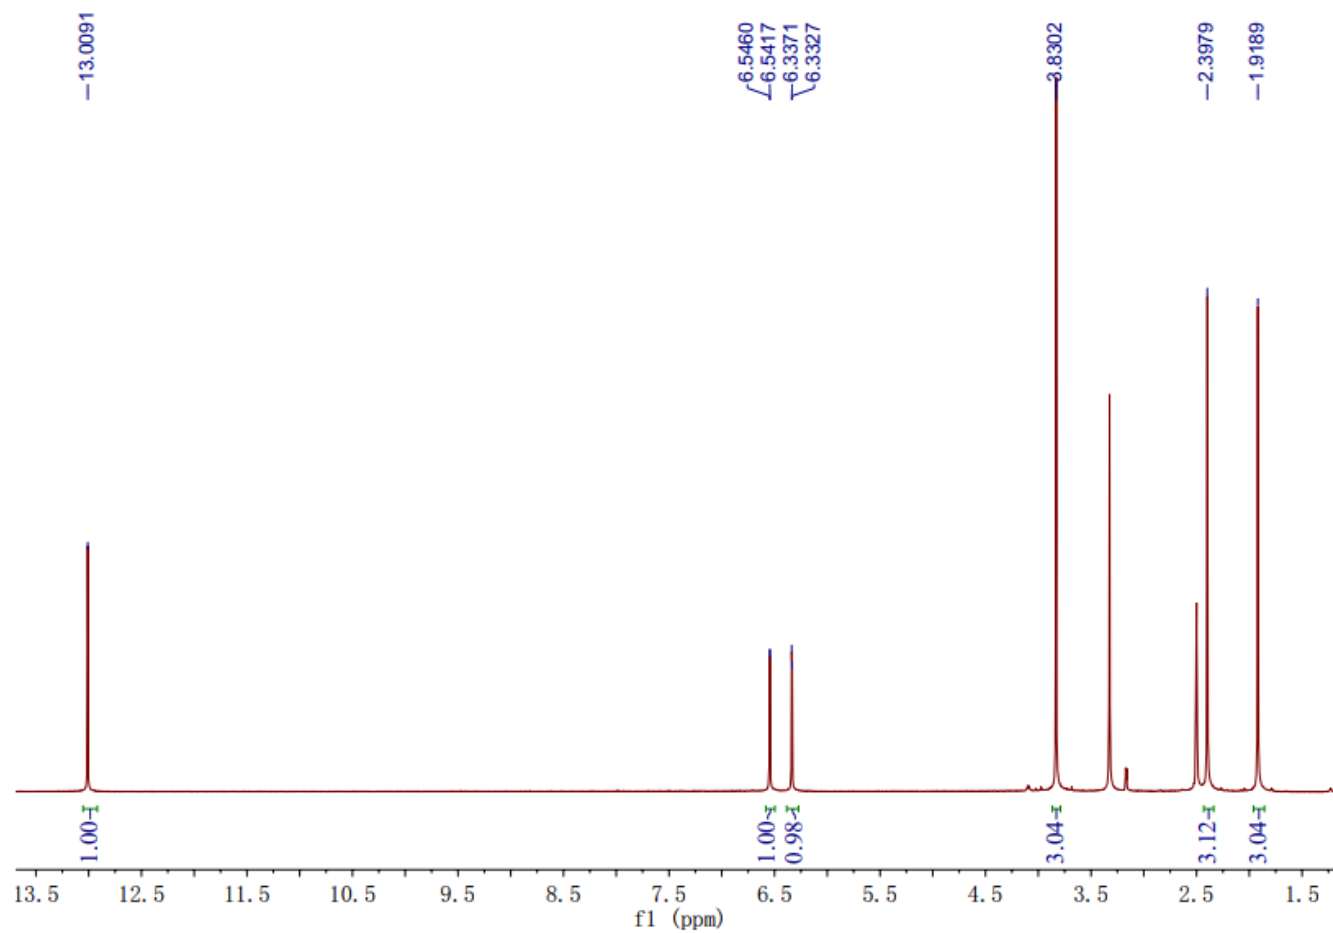

**Figure S32.**  $^{13}\text{C}$  NMR (125 MHz,  $\text{DMSO-}d_6$ ) and DEPT spectra of compound **6**.

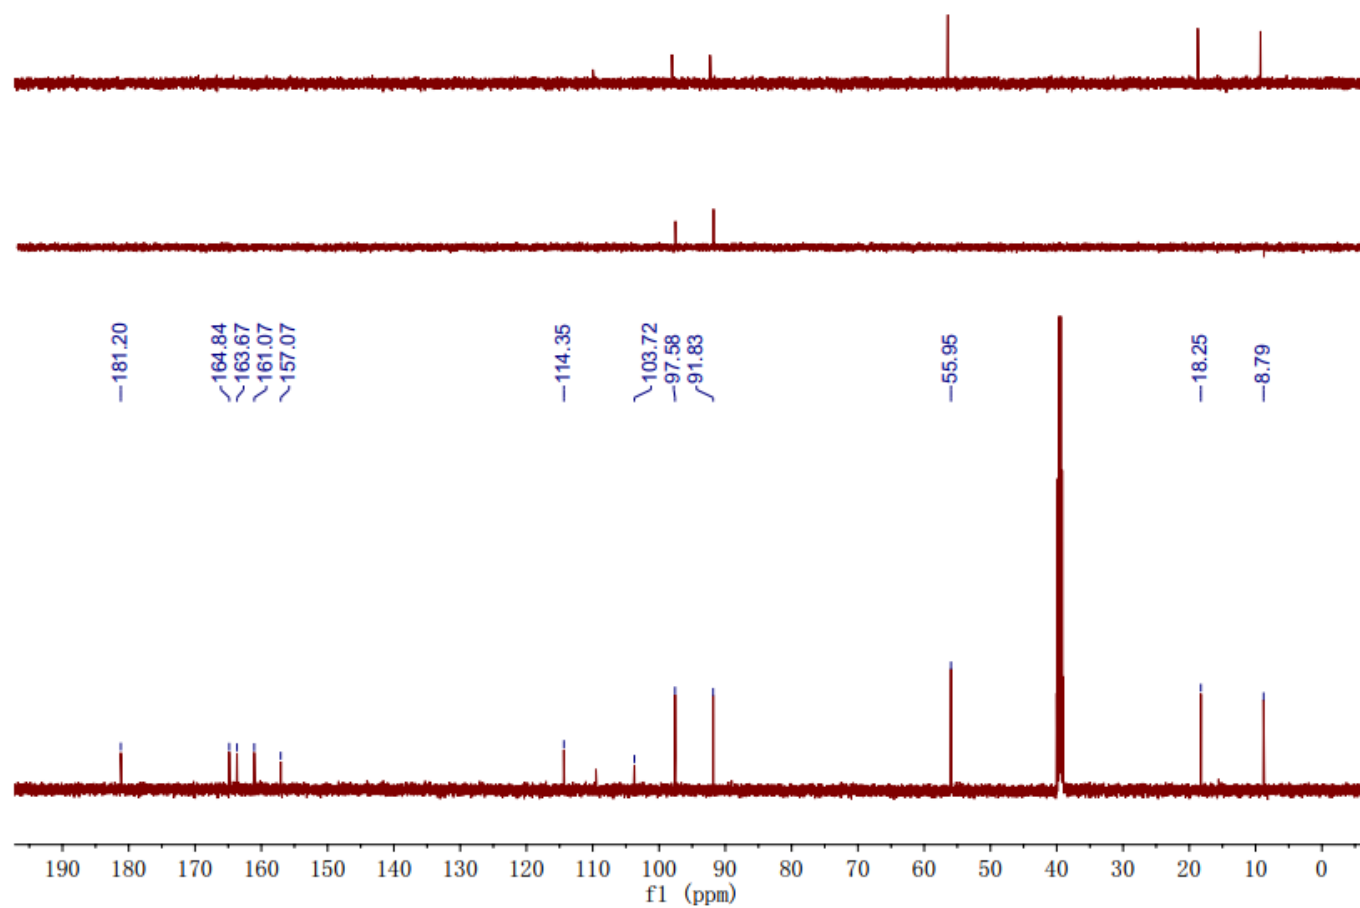

Supplement: s1 [file s1]
